# Supplementary material
Source: MDPI journal article supplement (https://www.mdpi.com/2624-8549/3/4/82)

# Q-Tube®-Assisted Alkylation and Arylation of Xanthenes and Other N-H-Containing Heterocycles in Water

Cecilia Scimmi <sup>1</sup>, Margherita Cardinali <sup>1</sup>, Laura Abenante <sup>1,2</sup>, Marina Amatista <sup>1</sup>, Francesca Giulia Nacca <sup>1,3</sup>, Eder J Lenardao <sup>2</sup>, Luca Sancineto <sup>1,\*</sup> and Claudio Santi <sup>1,\*</sup>

- <sup>1</sup> Group of Catalysis, Synthesis and Organic Green Chemistry, Department of Pharmaceutical Sciences, University of Perugia Via del Liceo 1, Perugia 06100, Italy;  
cecilia.scimmi@studenti.unipg.it (C.S.); margherita.cardinali@studenti.unipg.it (M.C.);  
laura.abenante2018@gmail.com (L.A.); Amatista.marina17@gmail.com (M.A.);  
nacca.francescagiulia@gmail.com (F.G.N.)
- <sup>2</sup> Laboratorio de Sintese Organica Limpa—LASOL, CCQFA, Universidade Federal de Pelotas—UFPel, P.O. Box 354, Pelotas 96010-900, Brazil; lenardao@ufpel.edu.br
- <sup>3</sup> Centre for Synthesis and Chemical Biology, School of Chemistry, University College Dublin, Dublin D04, N2E5, Ireland
- \* Correspondence: luca.sancineto@unipg.it (L.S.); claudio.santi@unipg.it (C.S.)

Copies of <sup>1</sup>H and <sup>13</sup>C NMR and HRMS spectra

S2

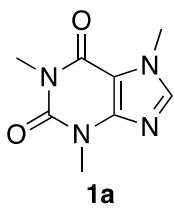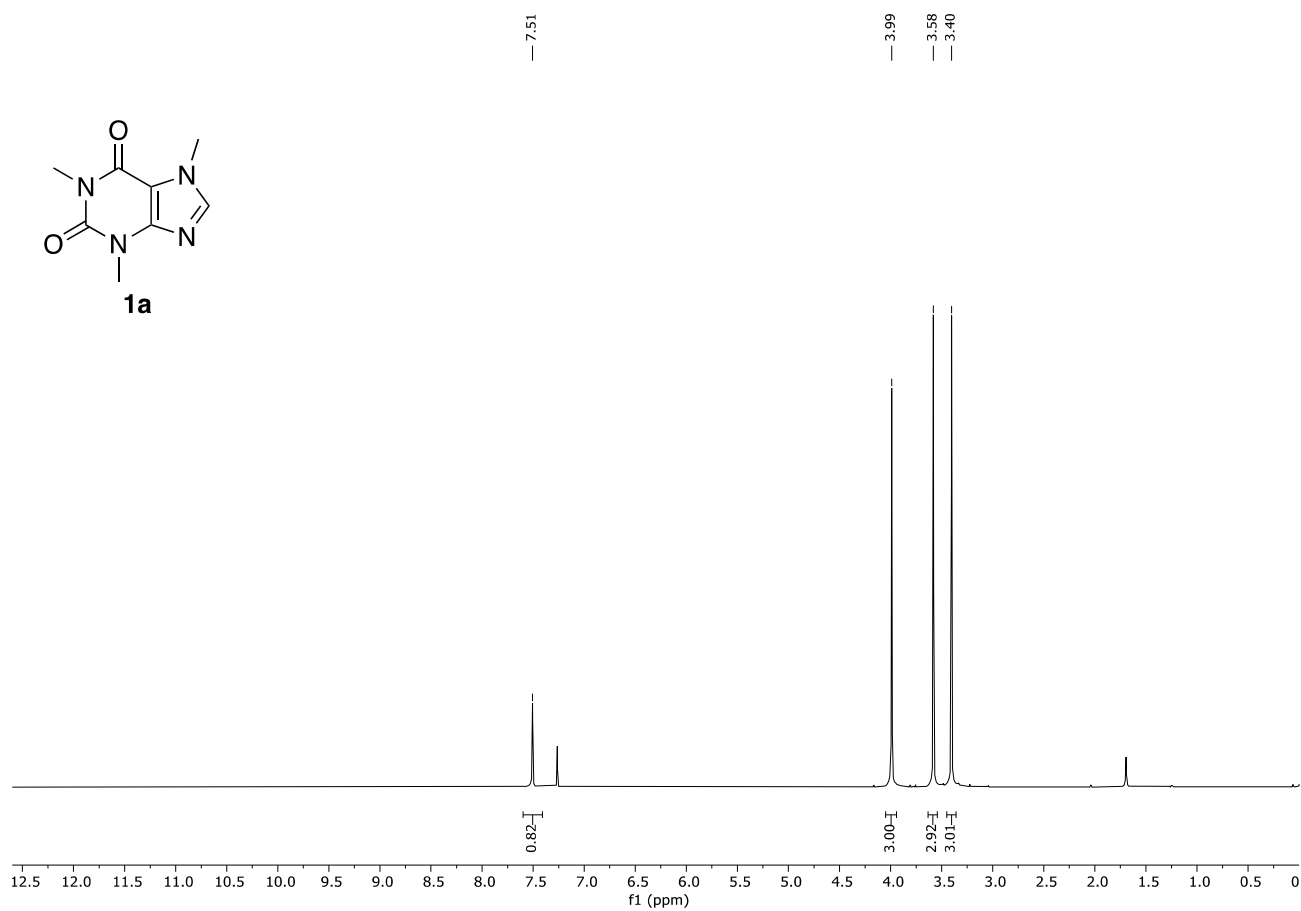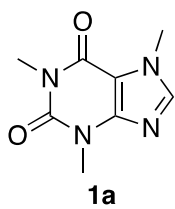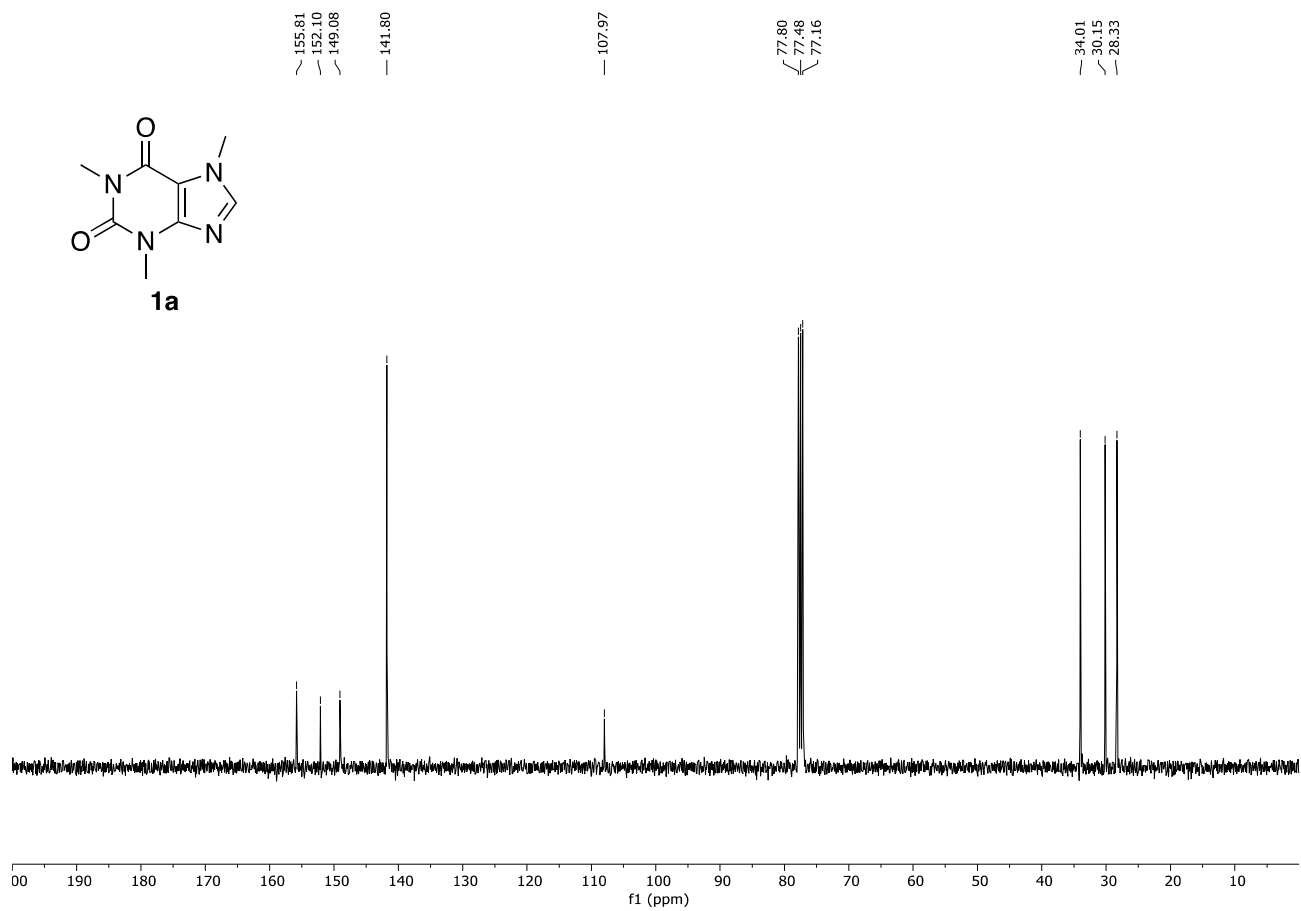

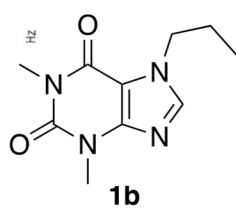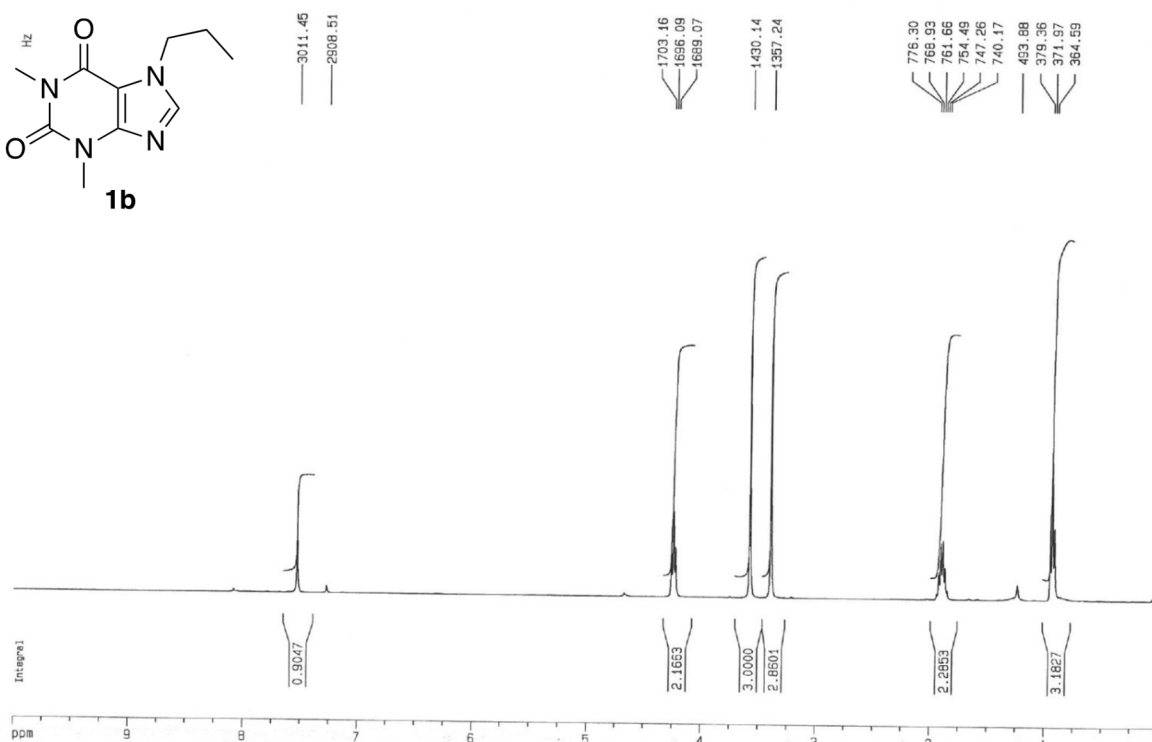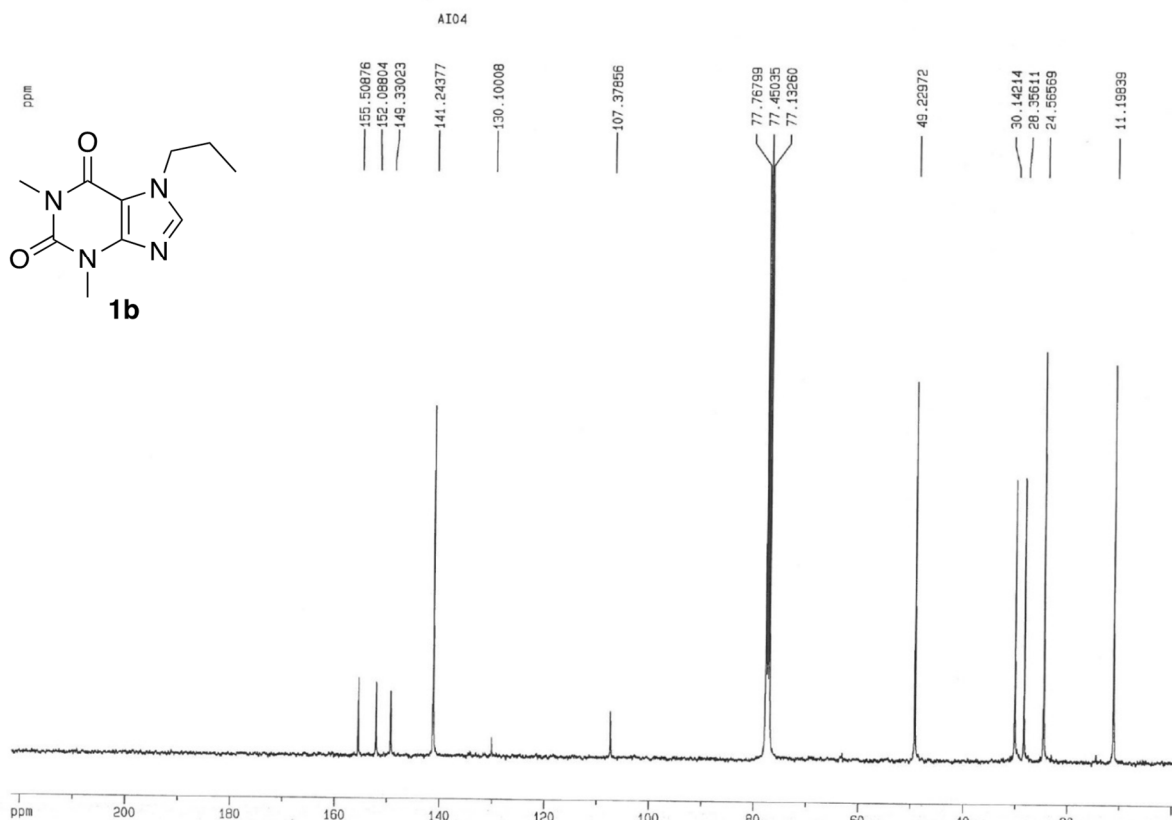

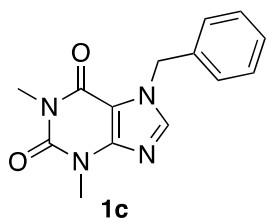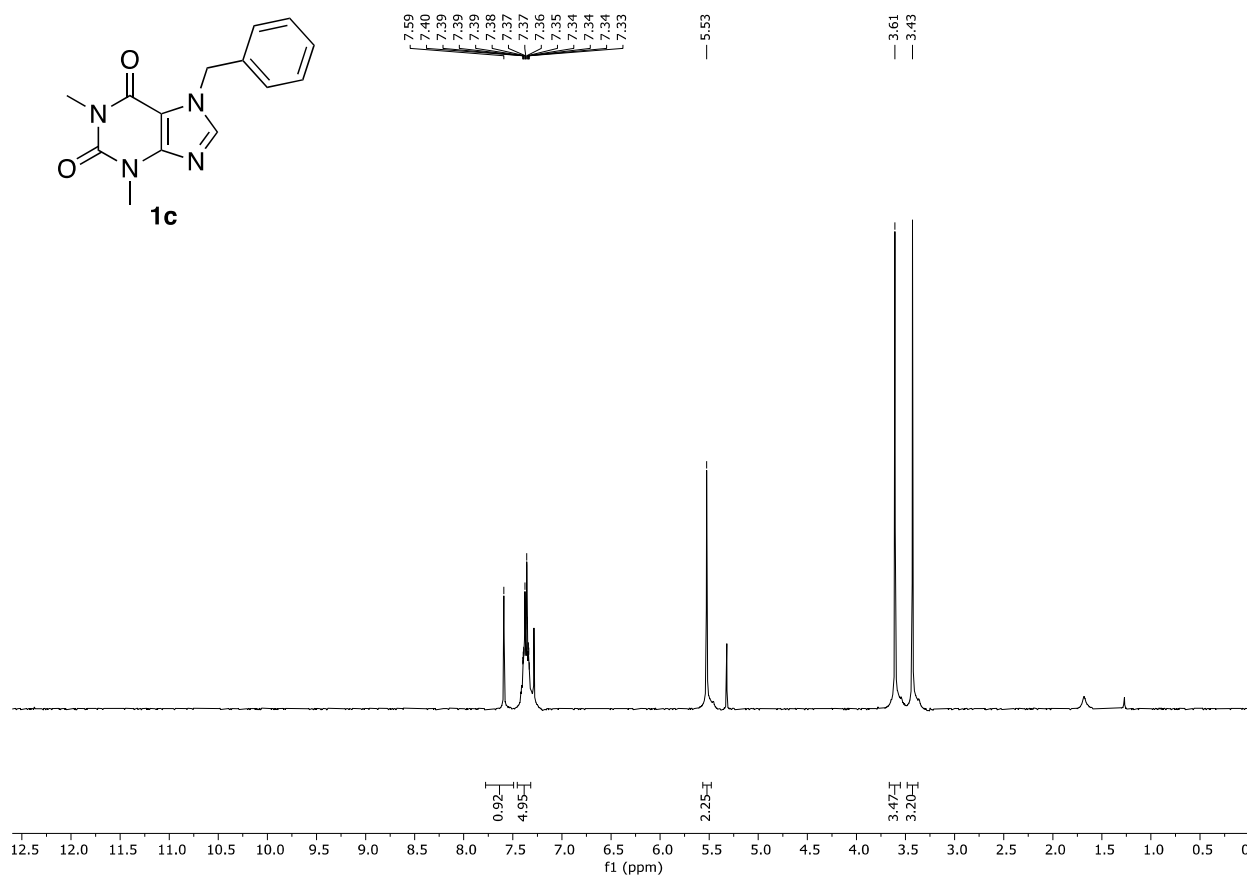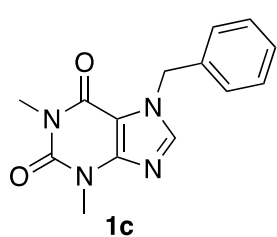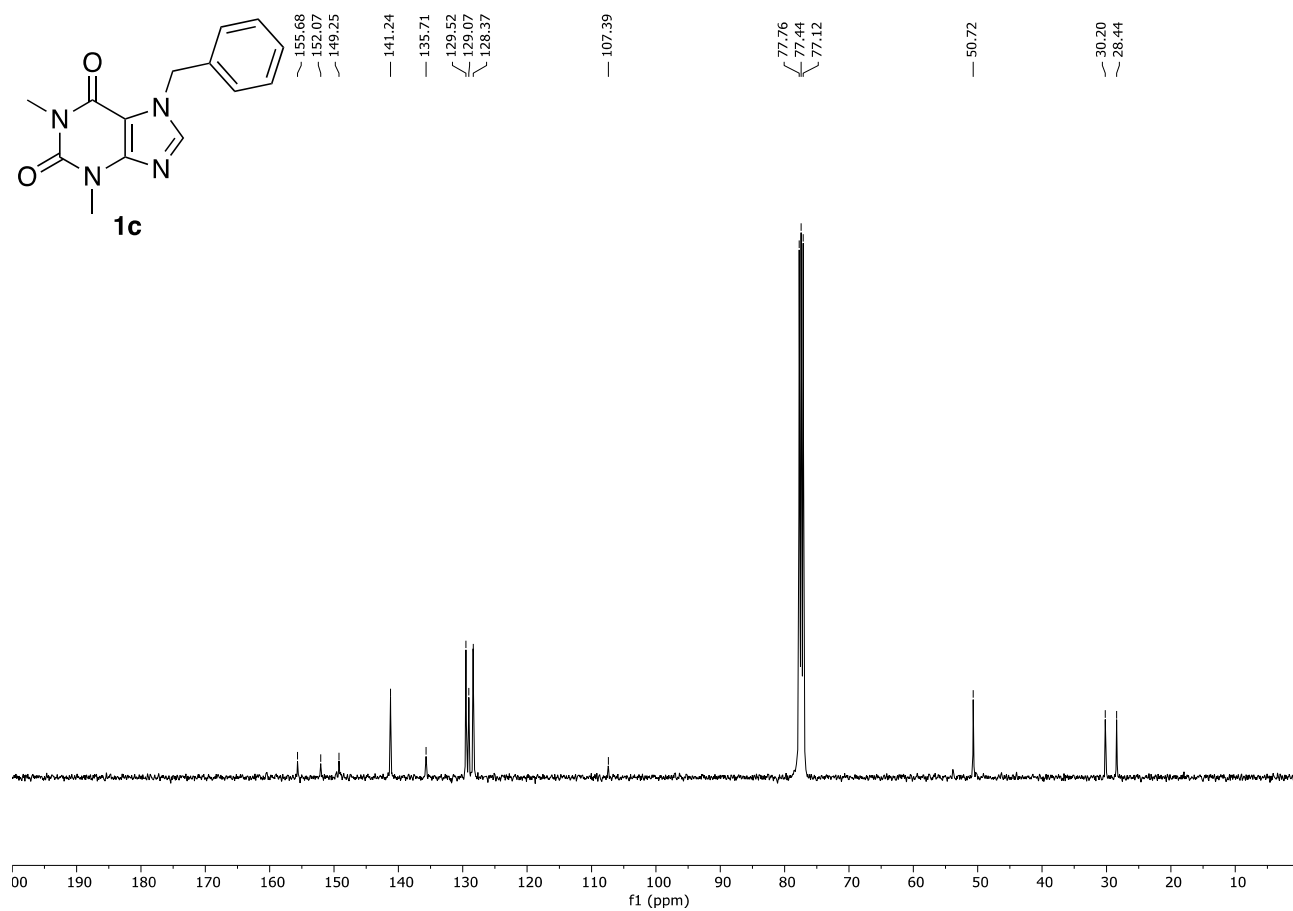

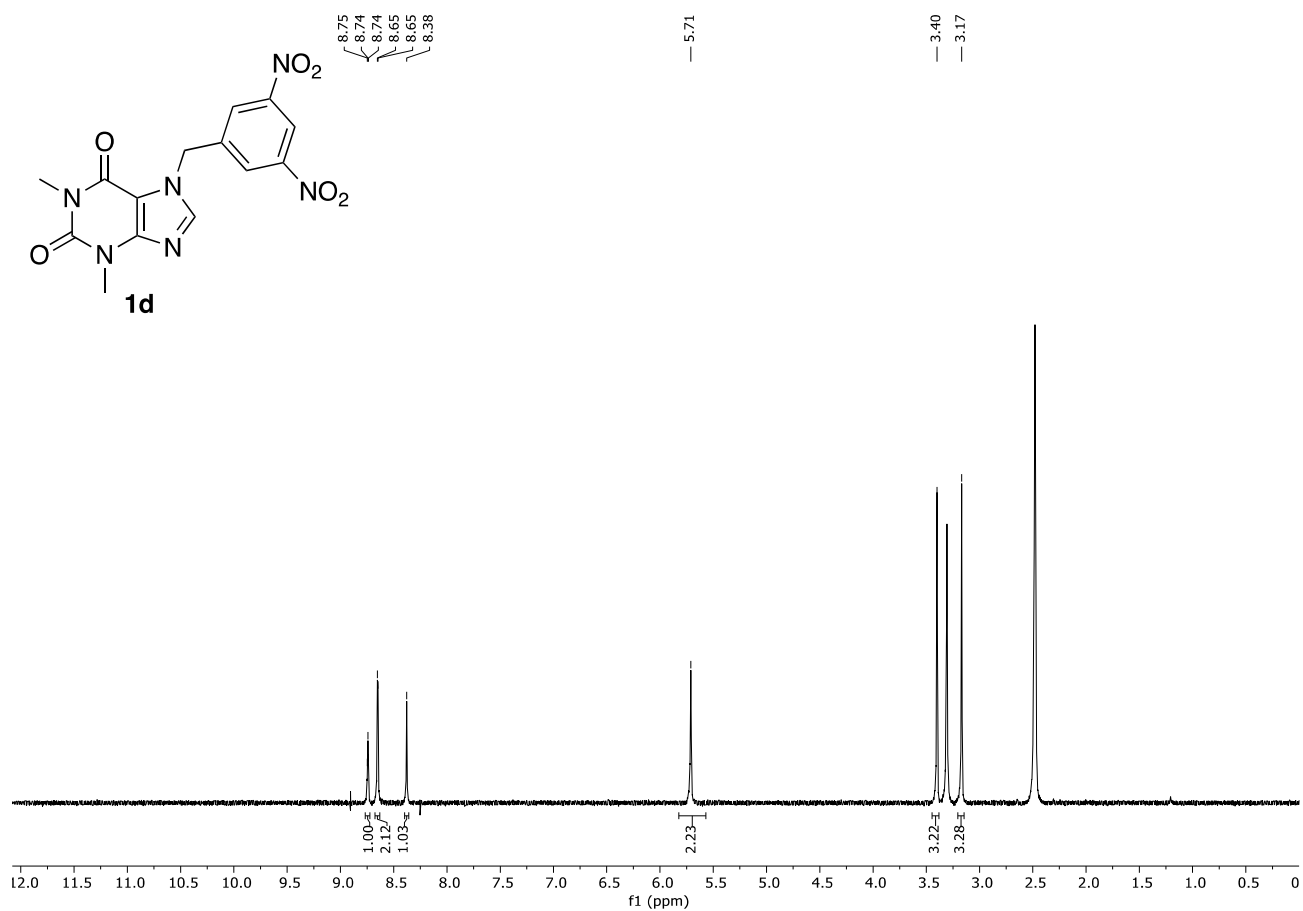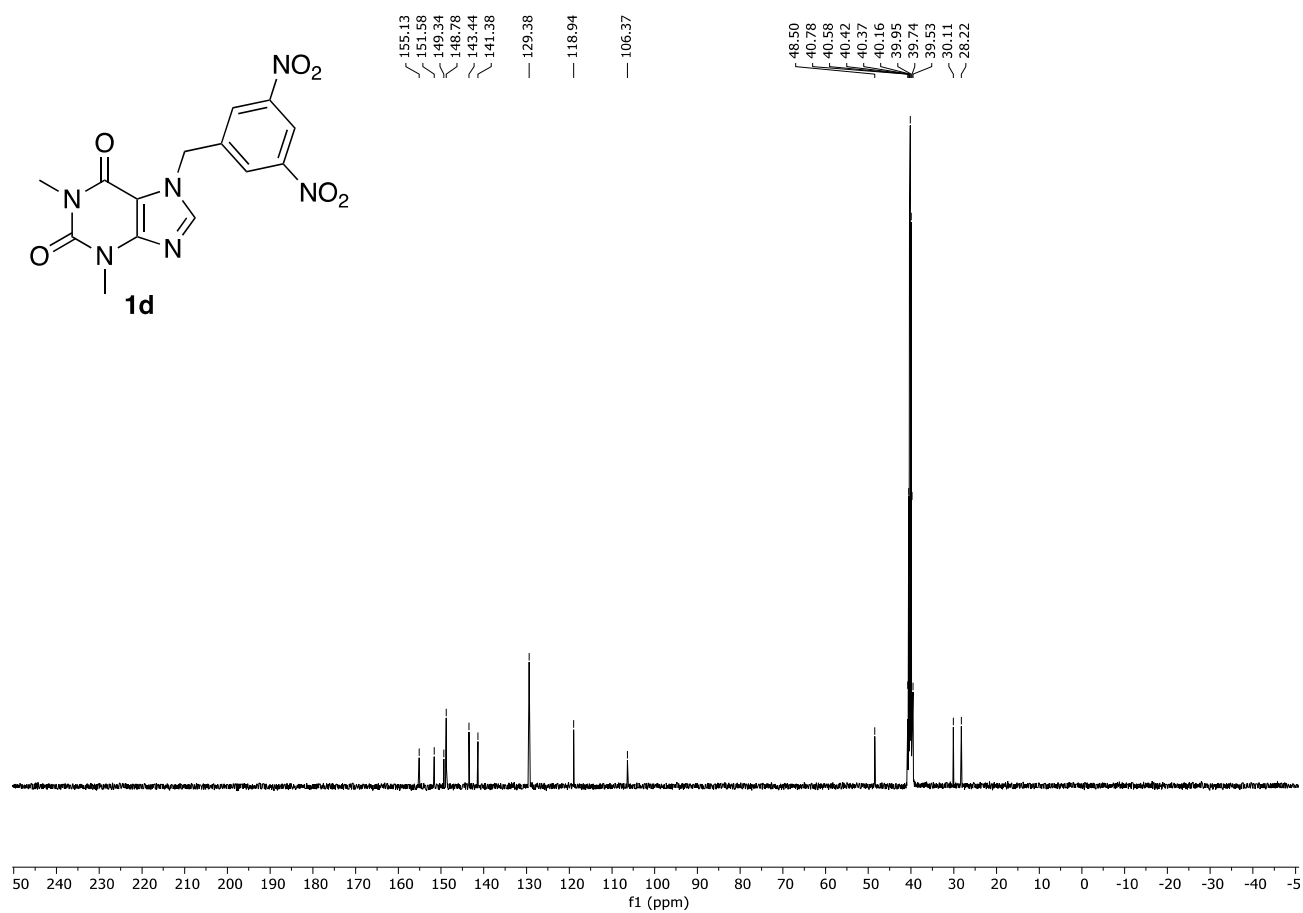

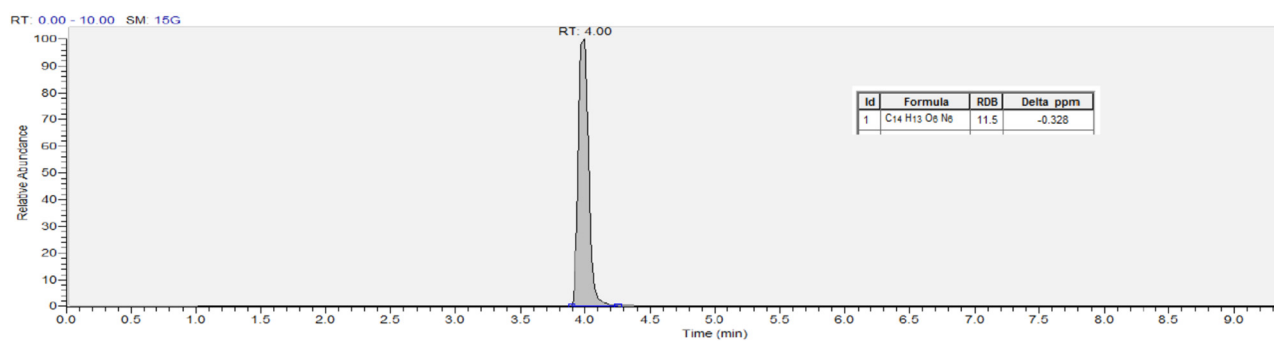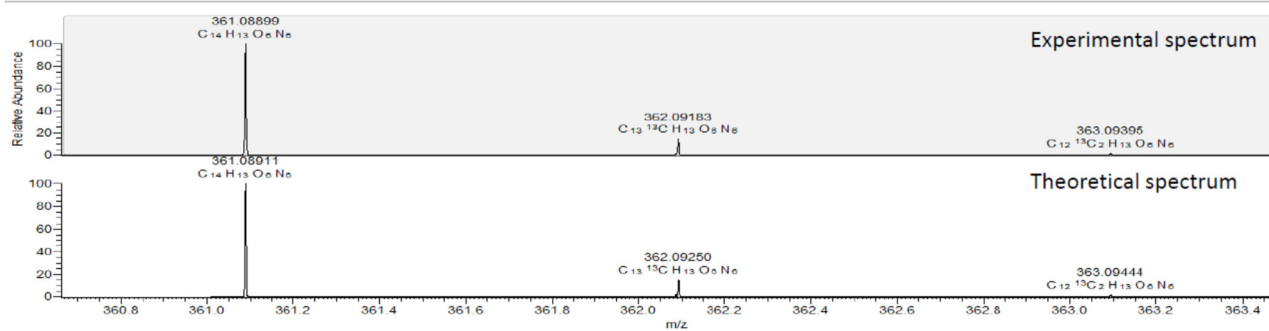

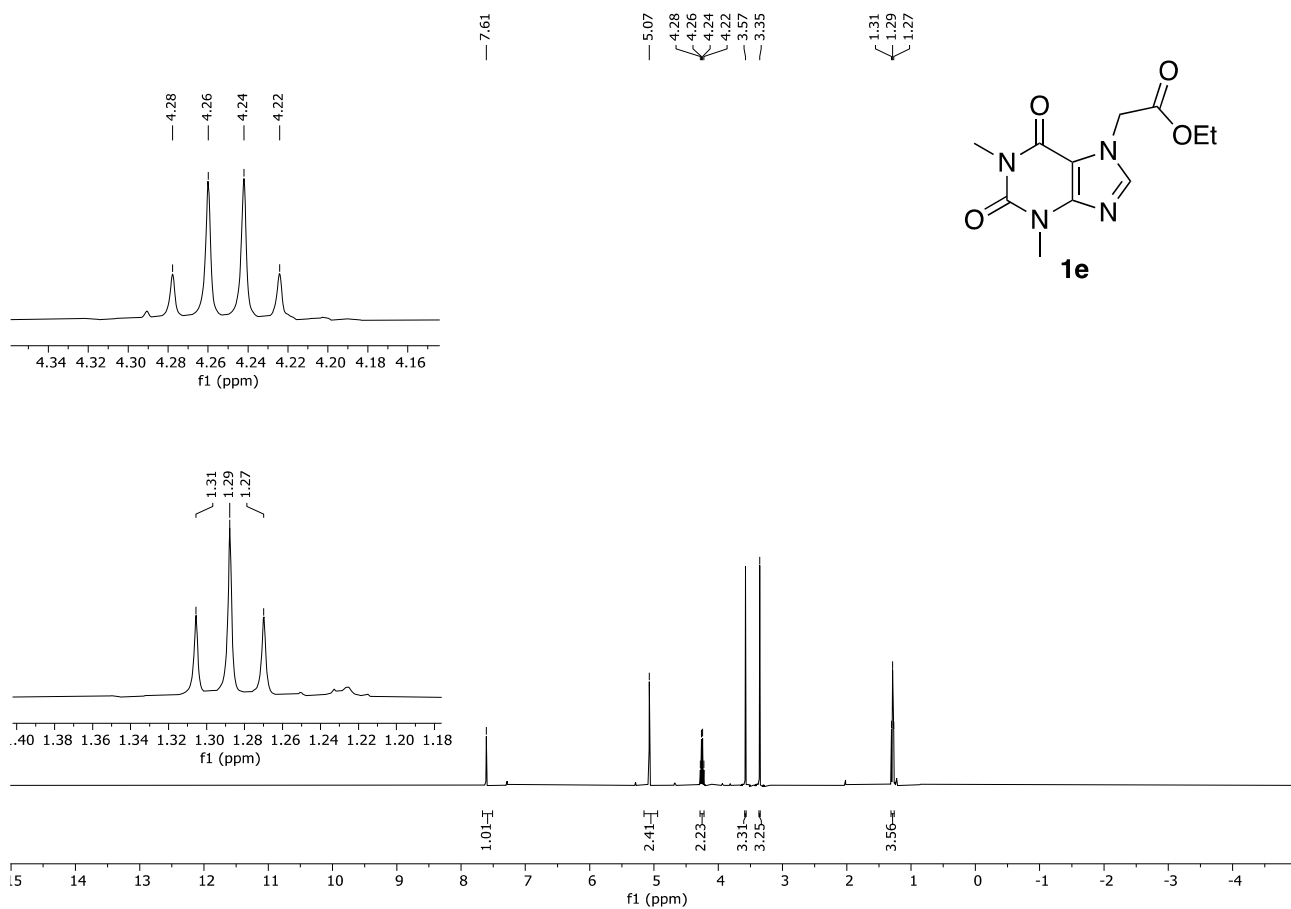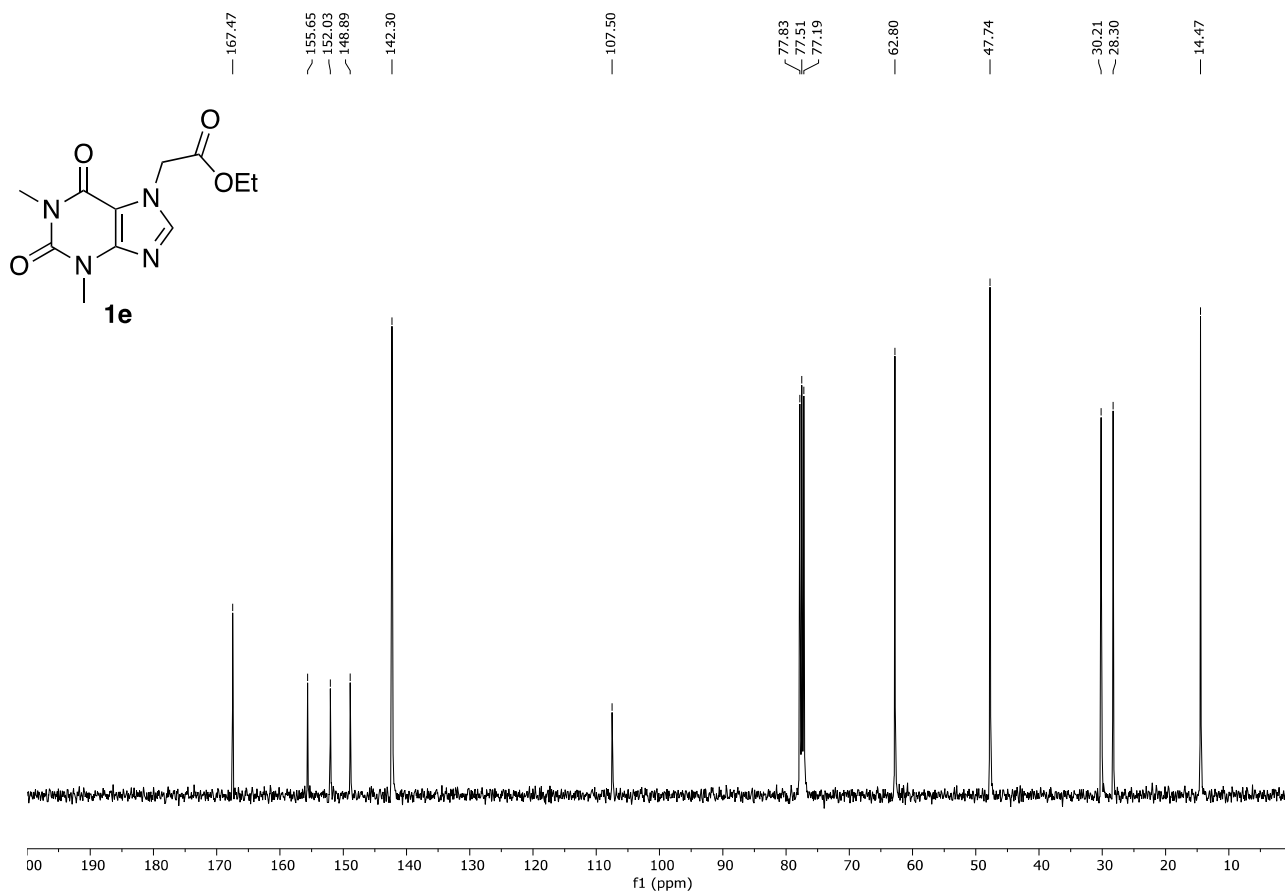

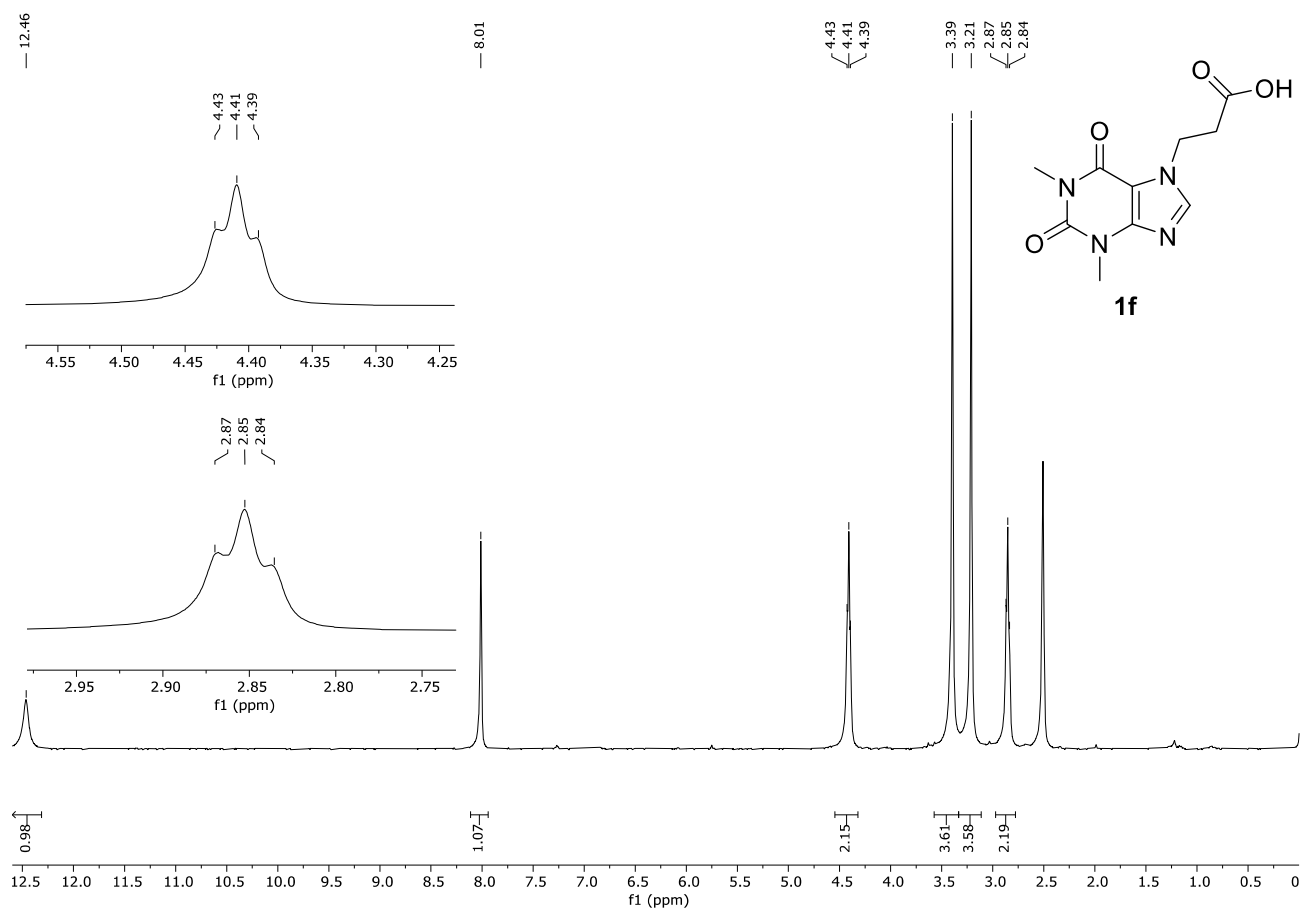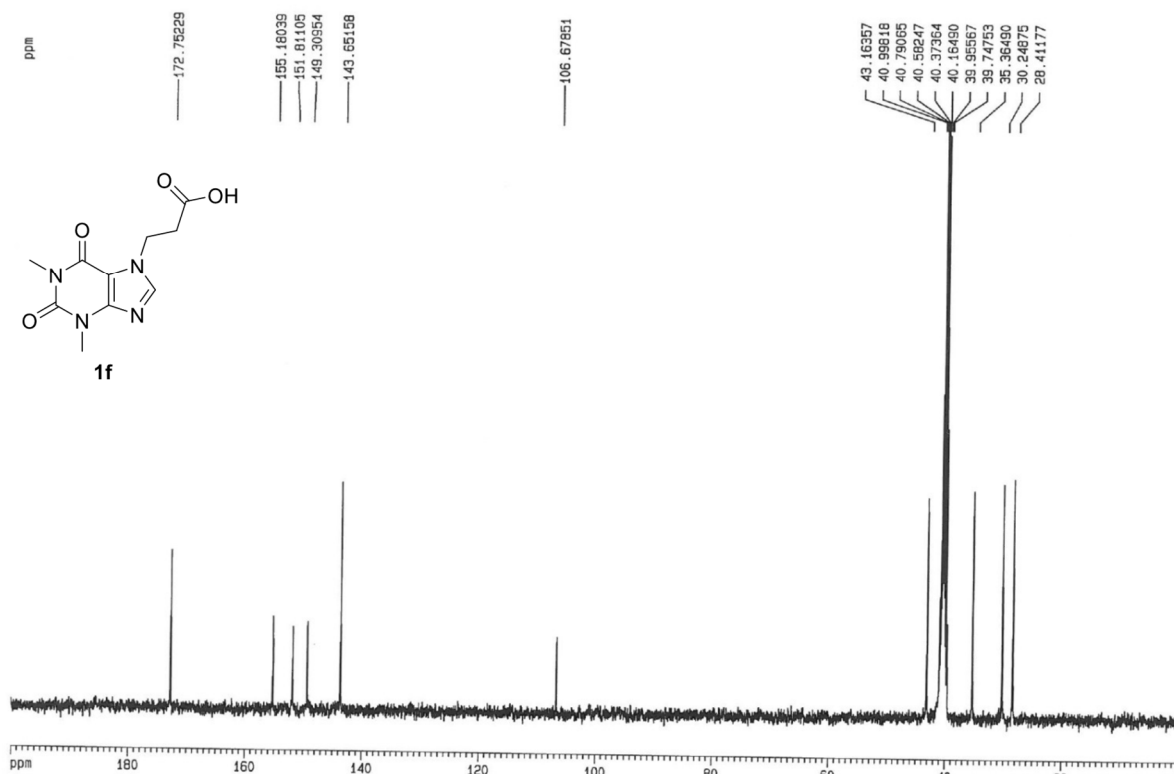



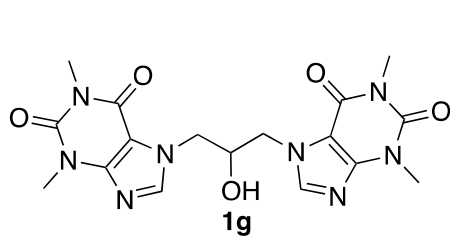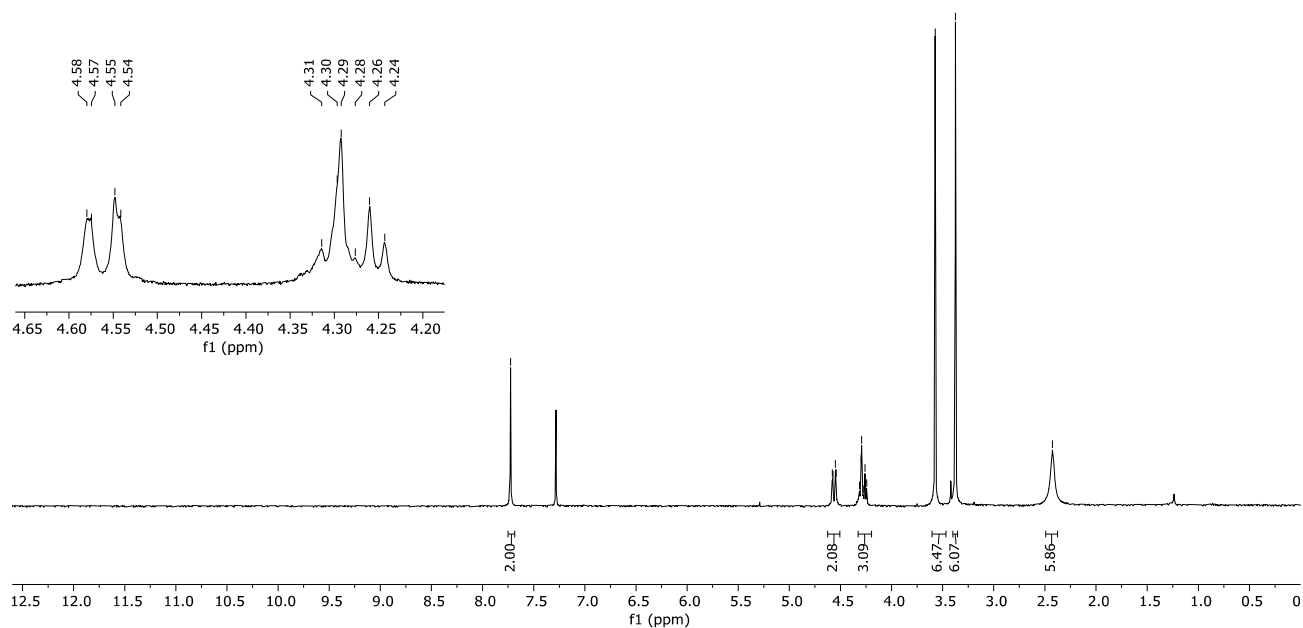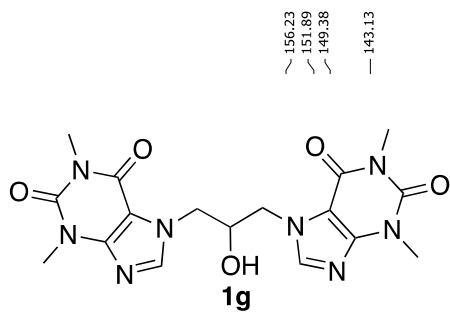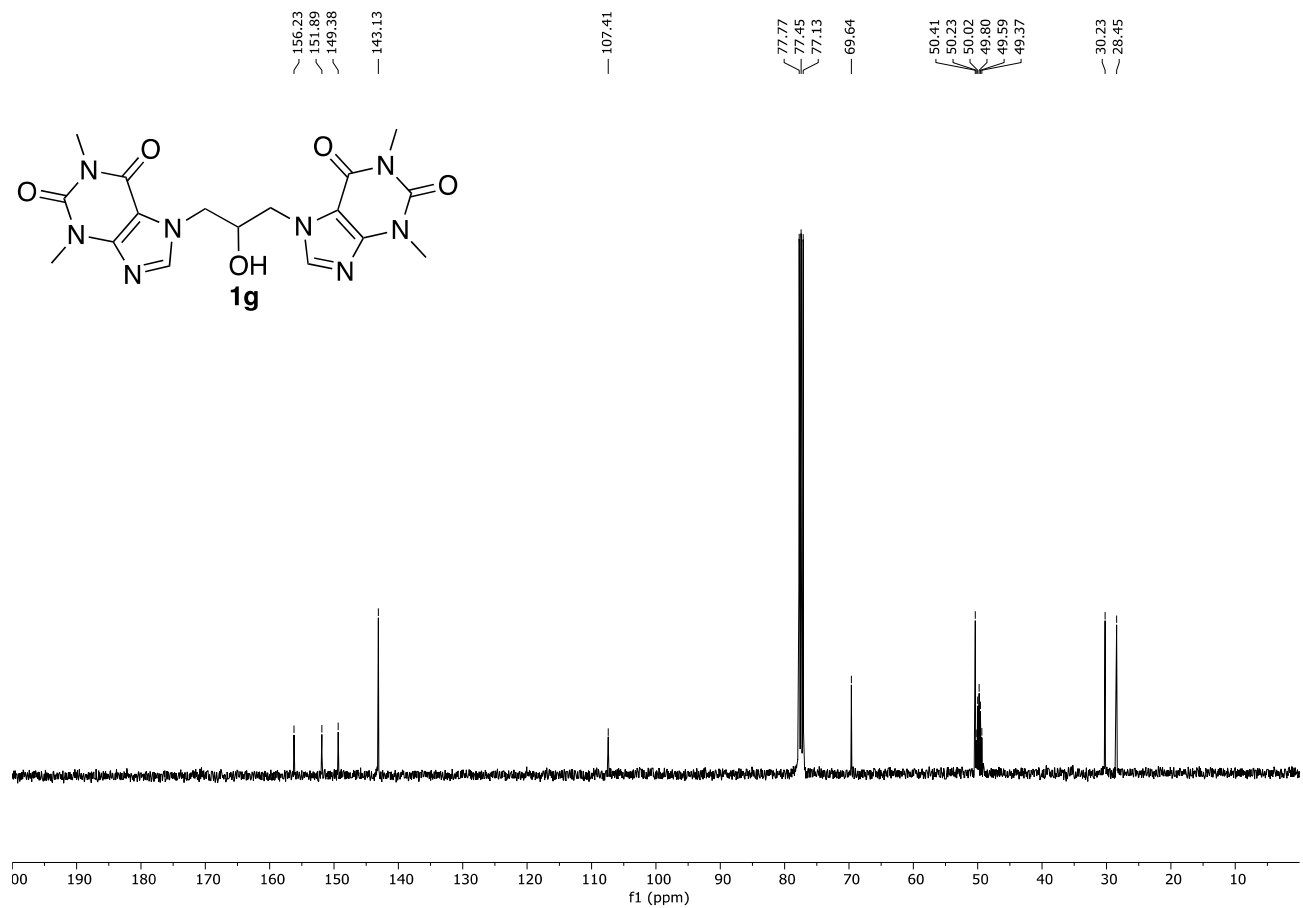

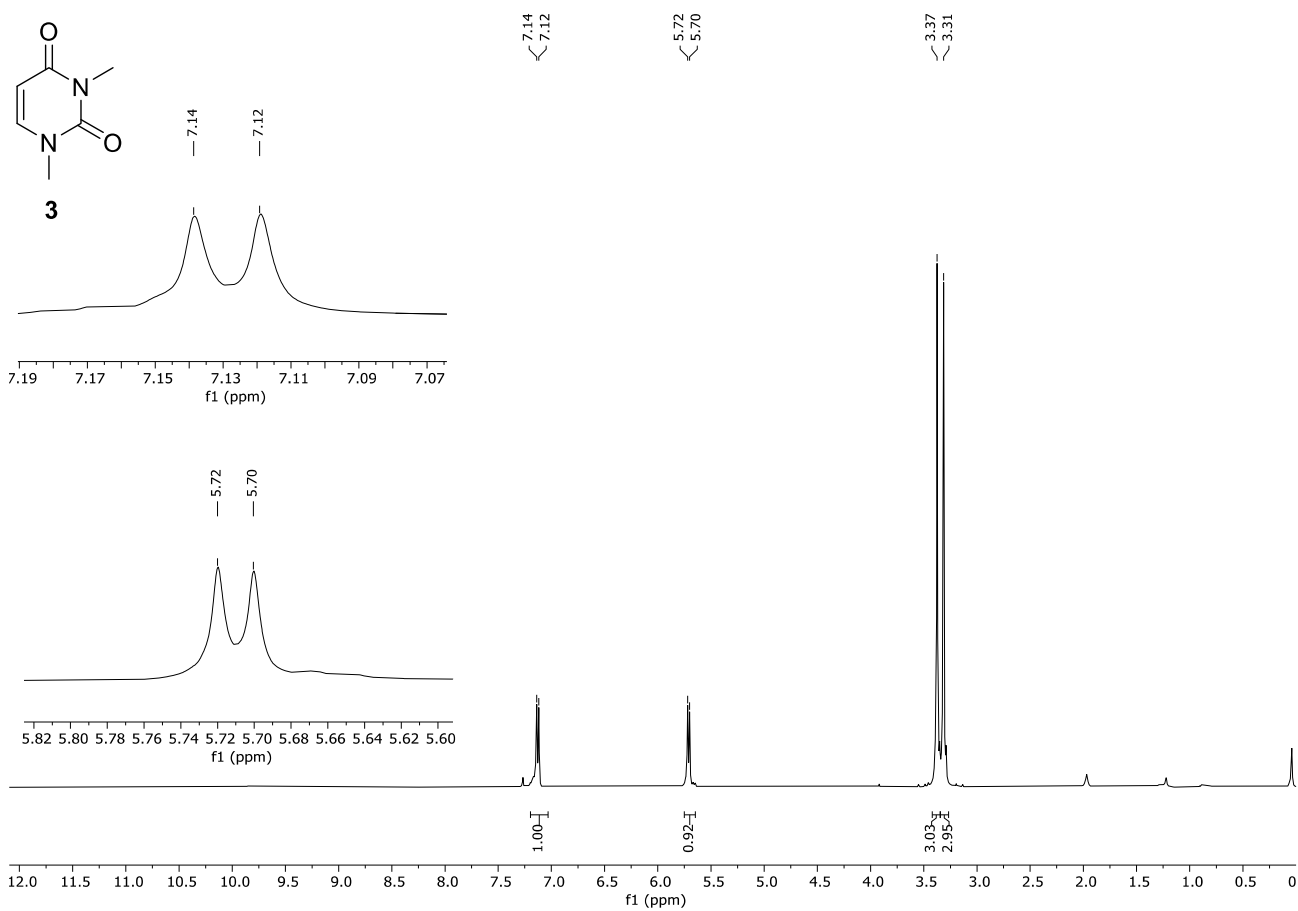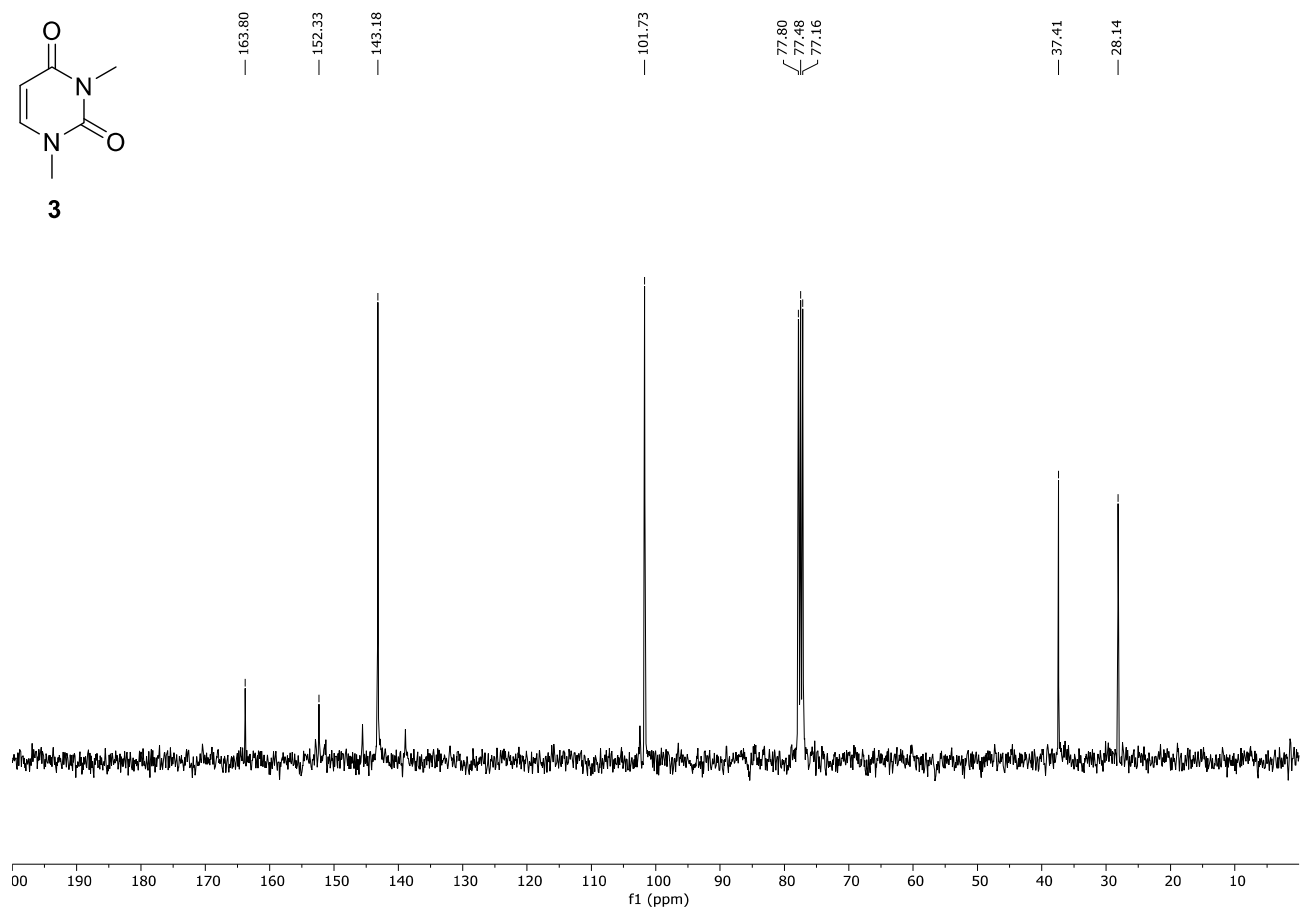

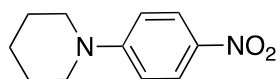

**14**

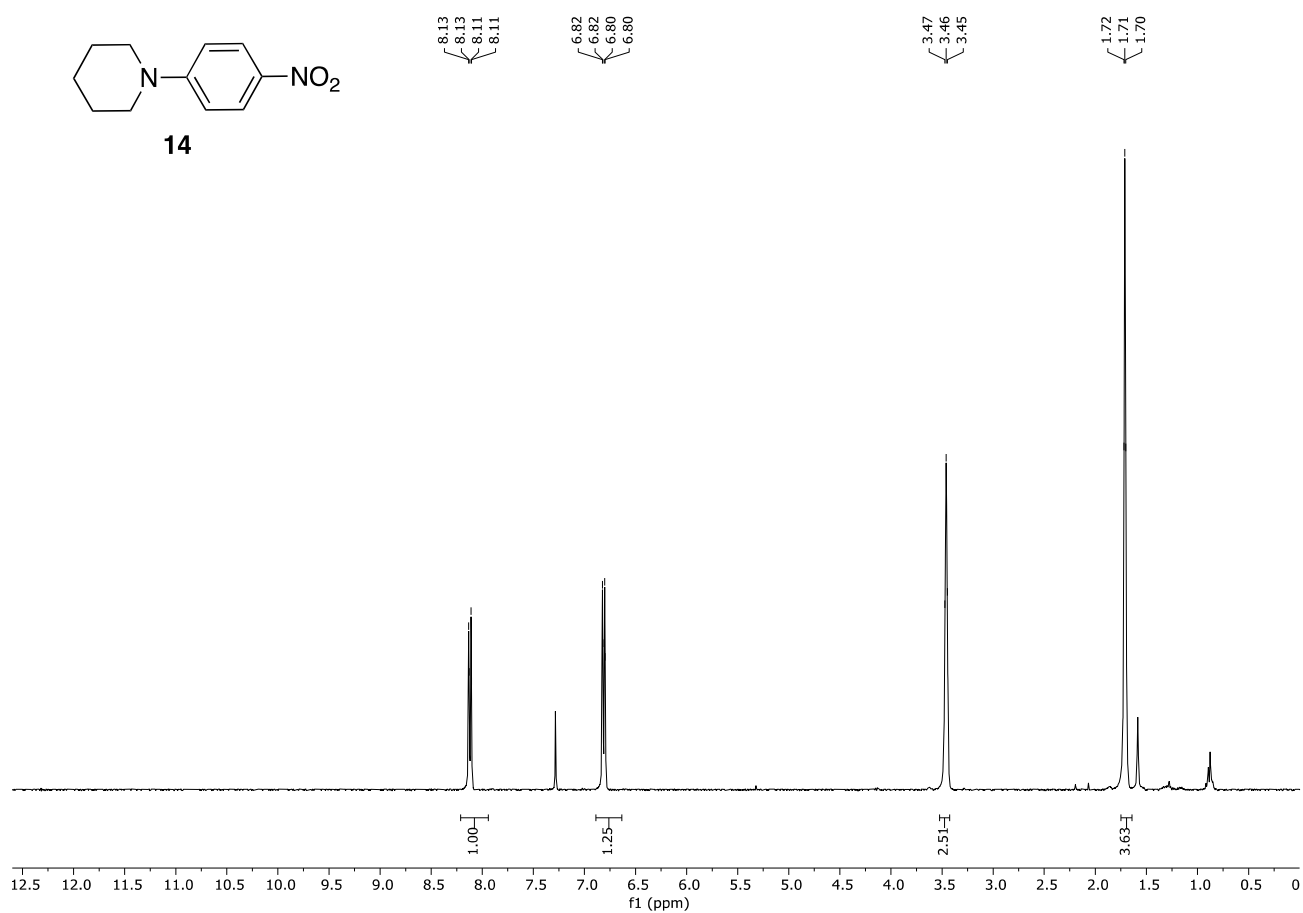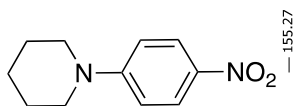

**14**

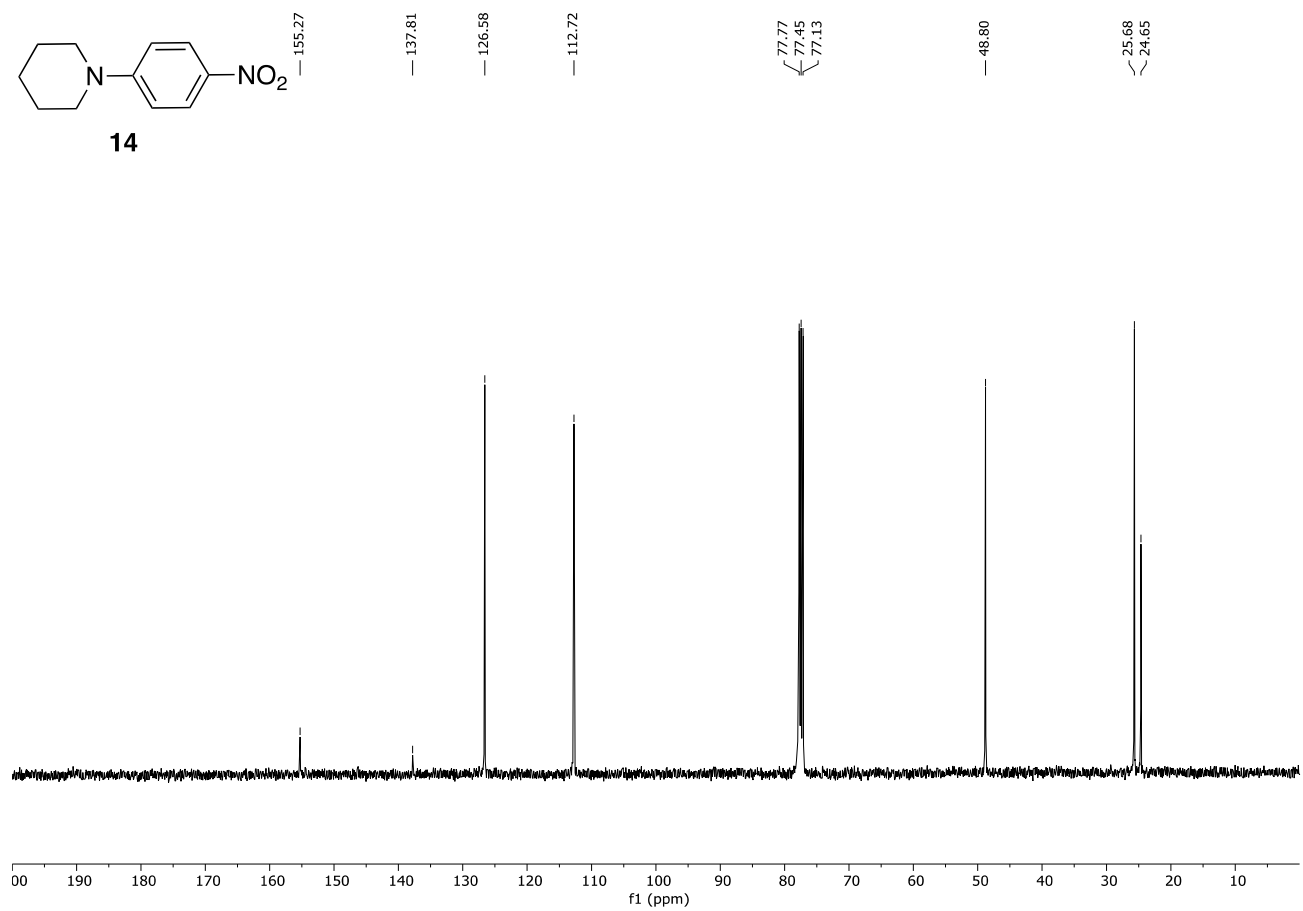

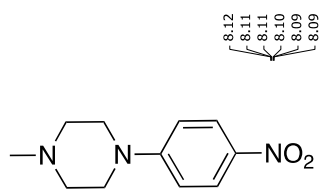

15

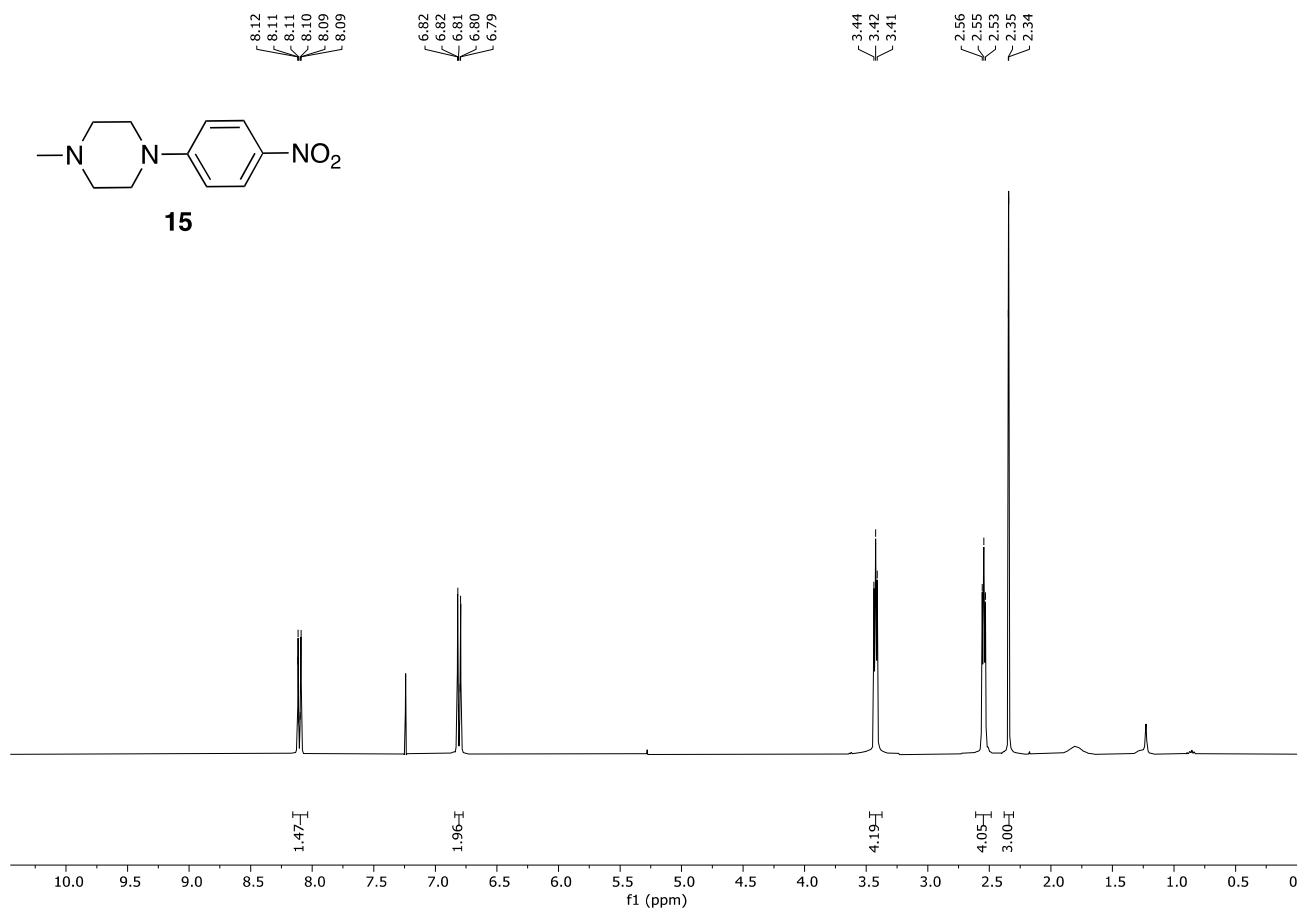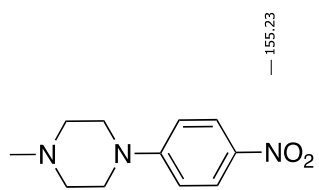

15

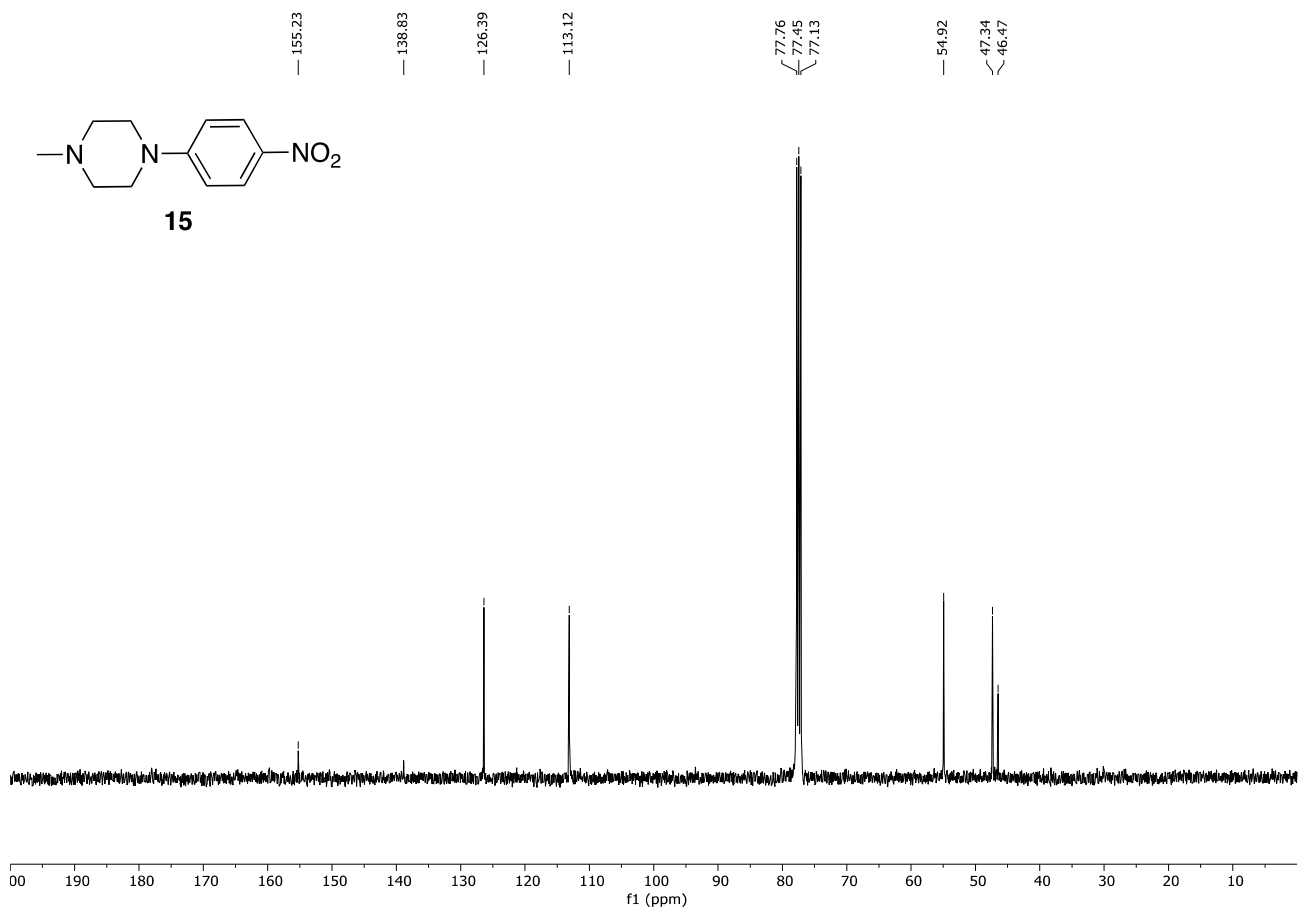

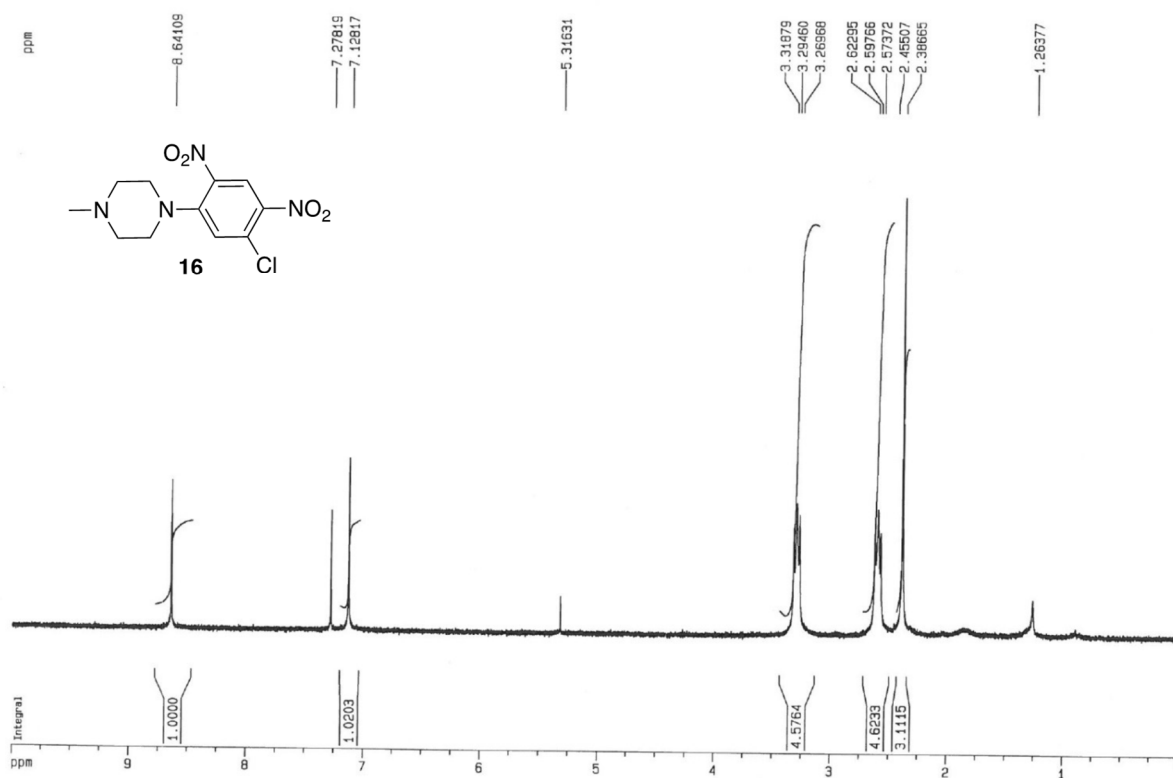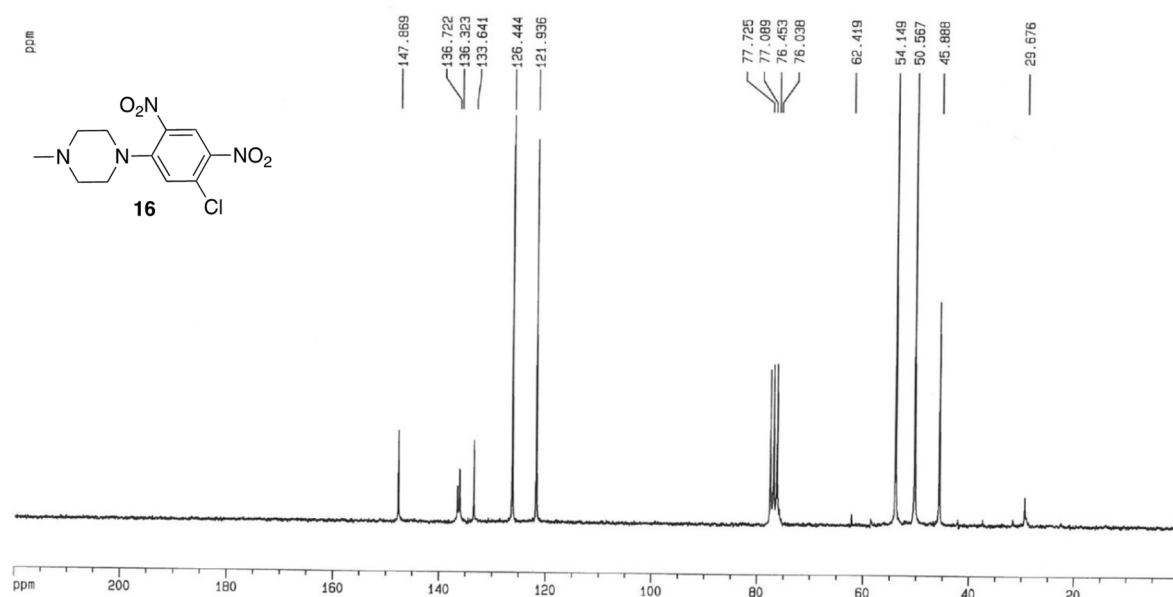

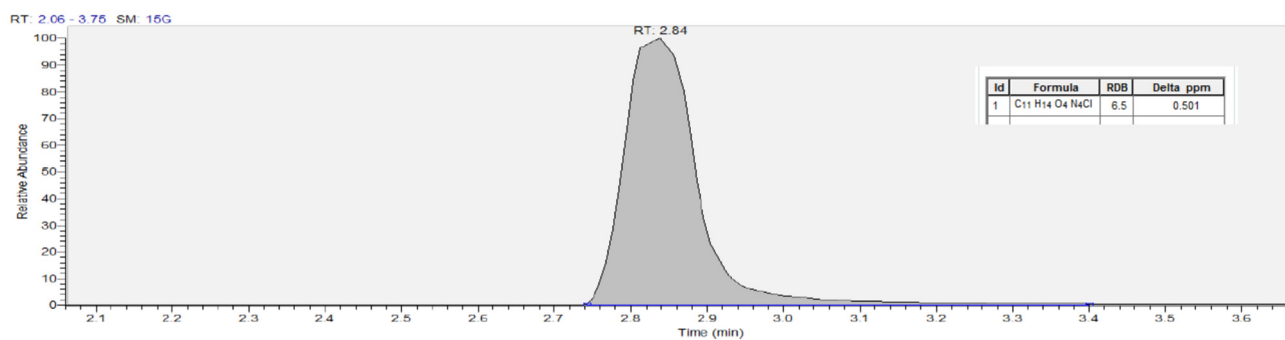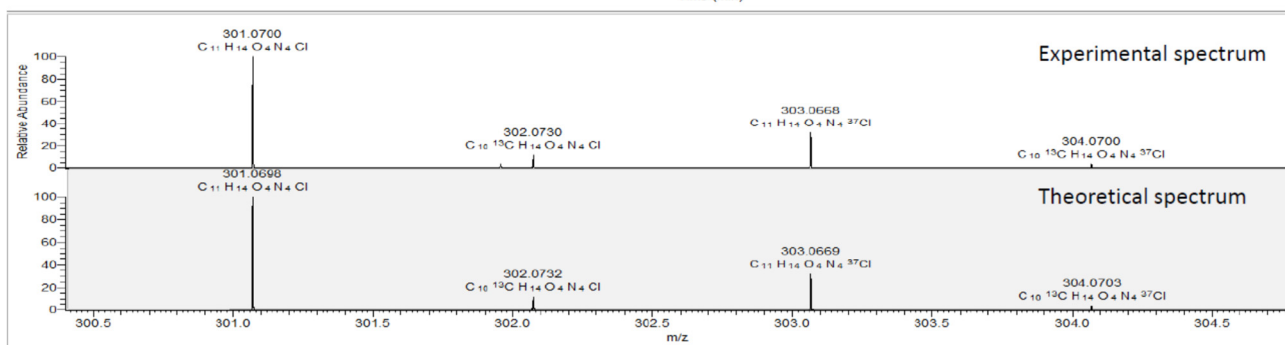

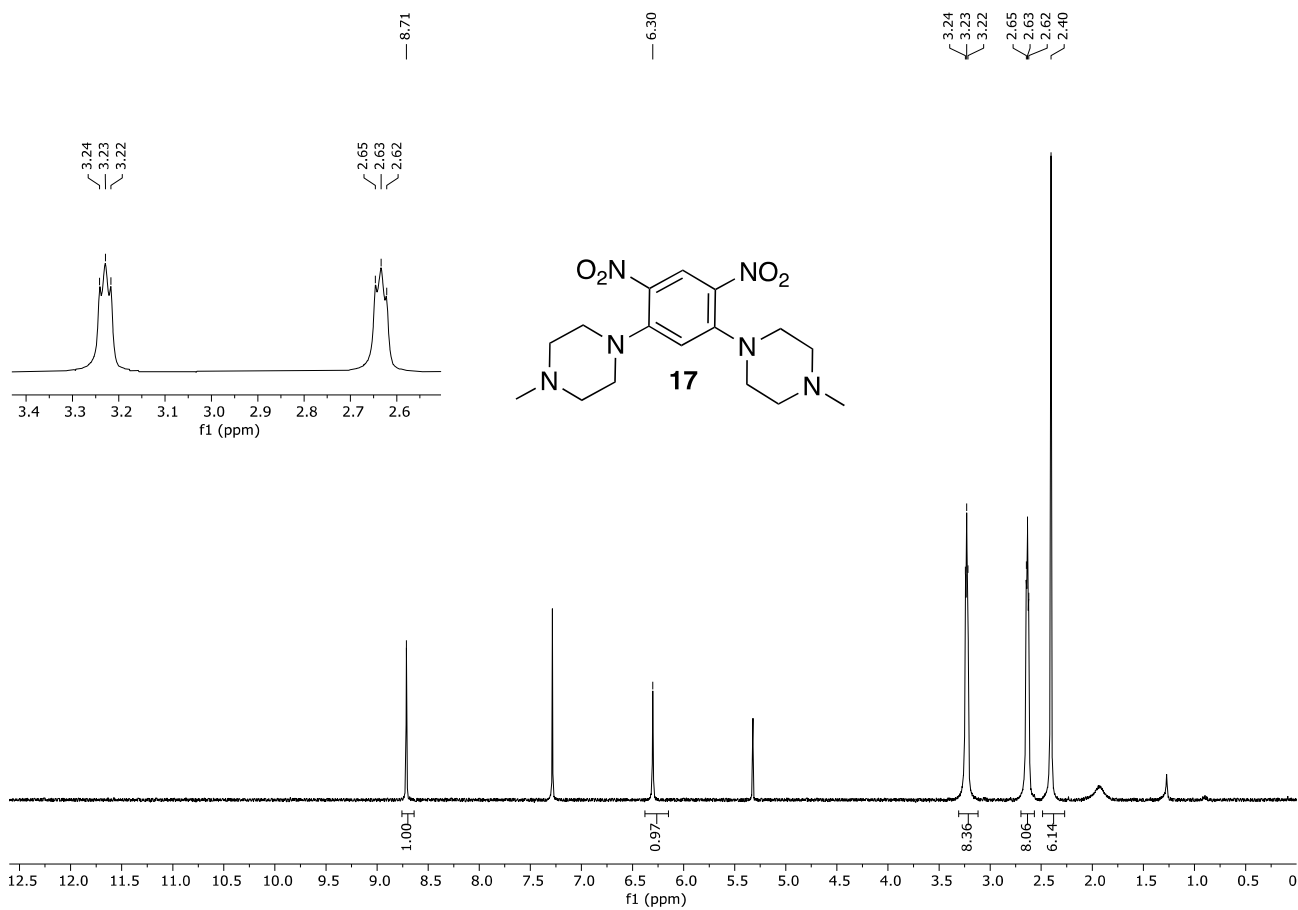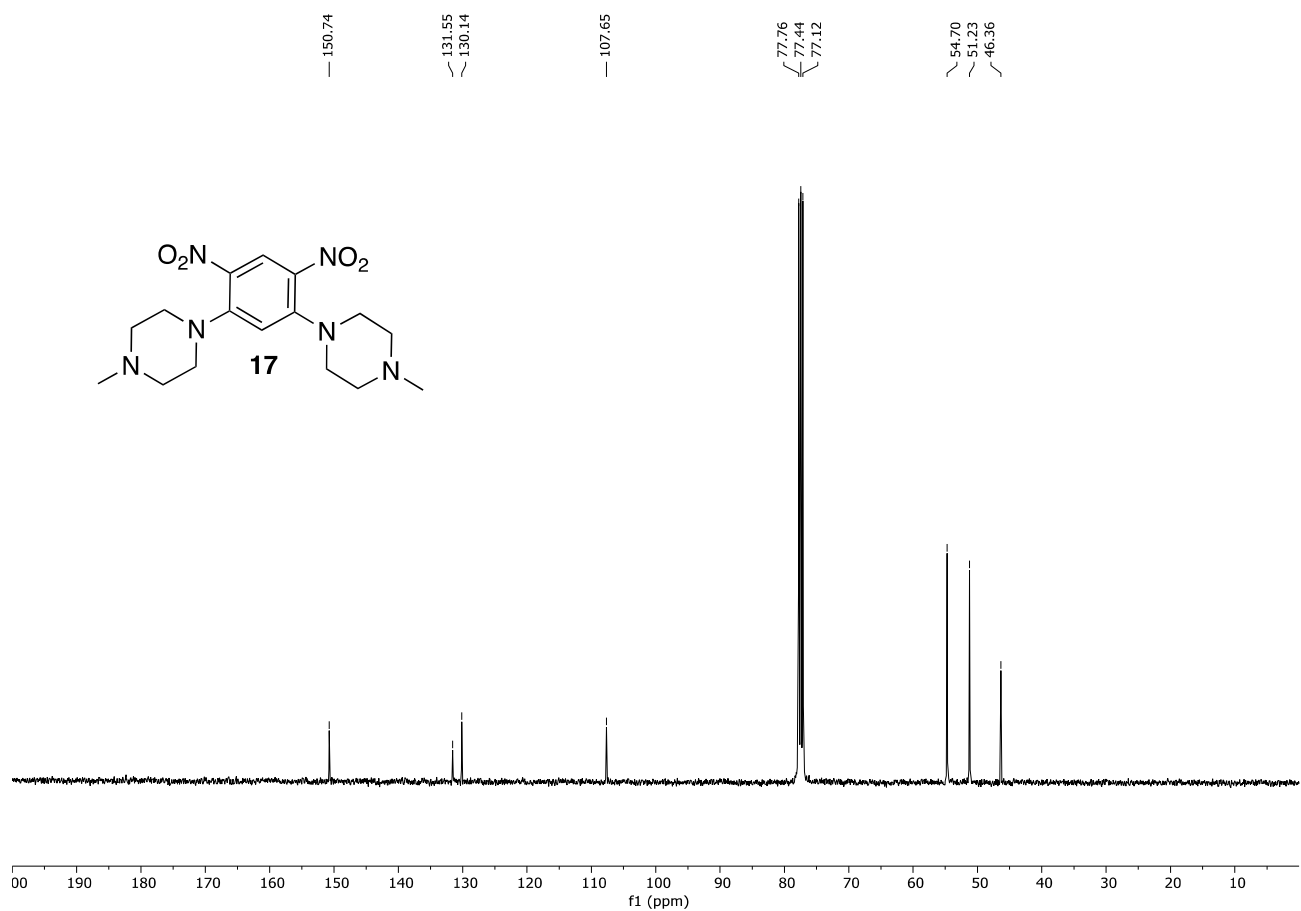

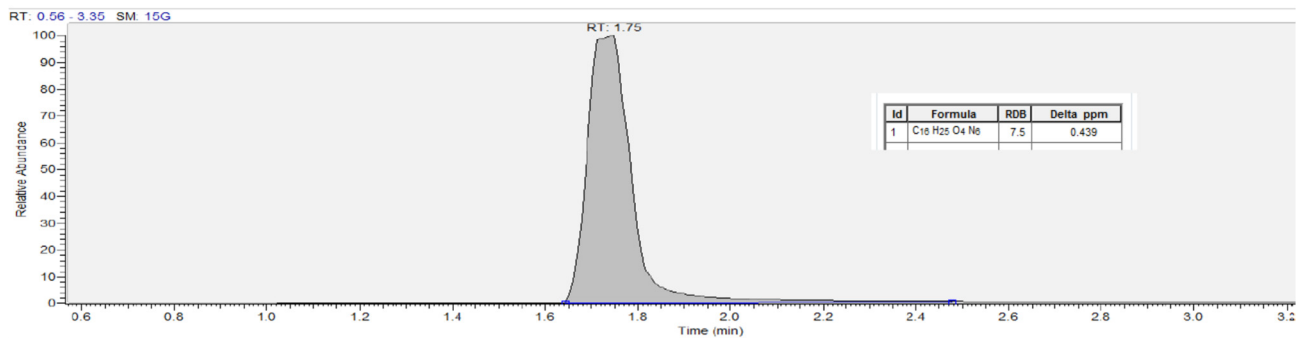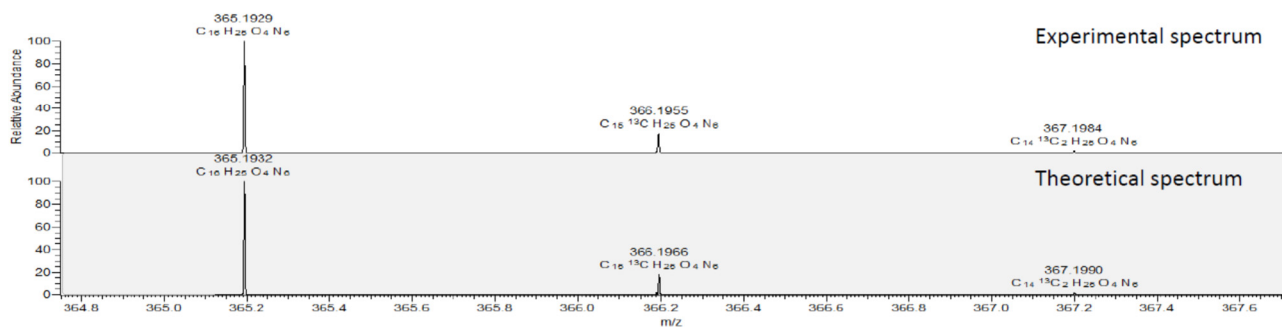



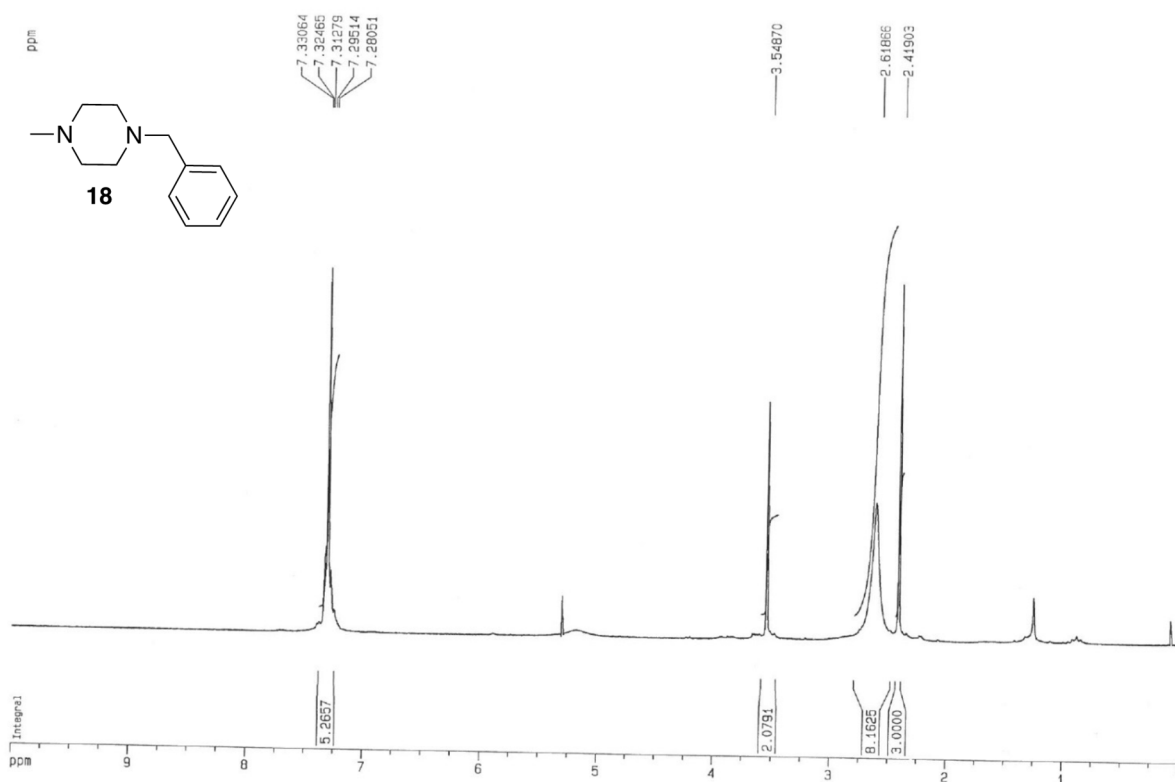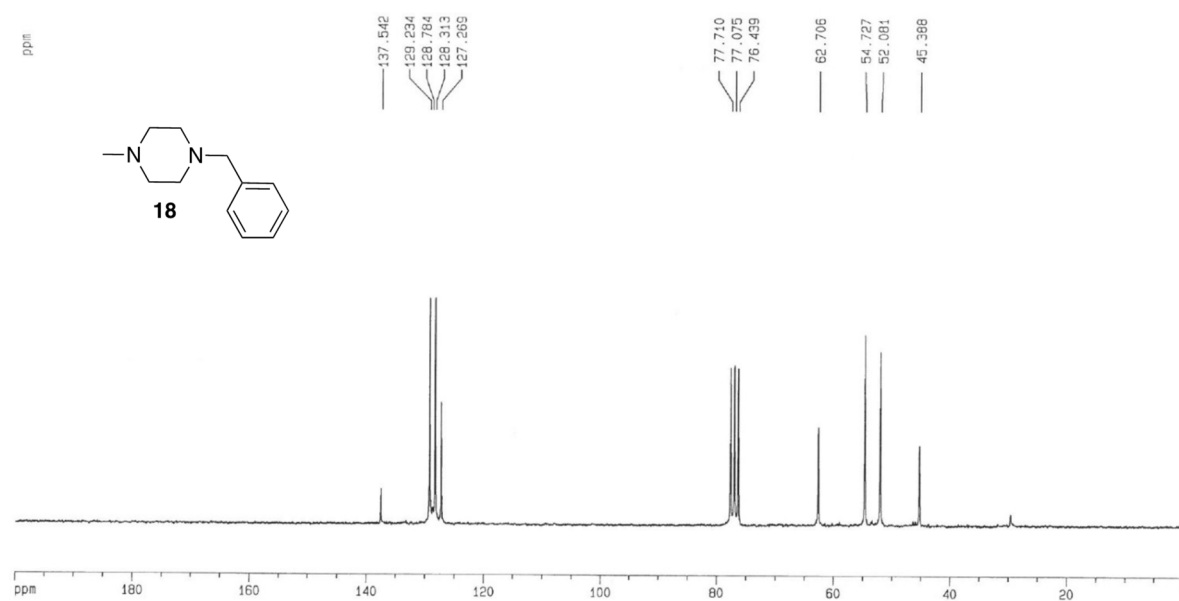

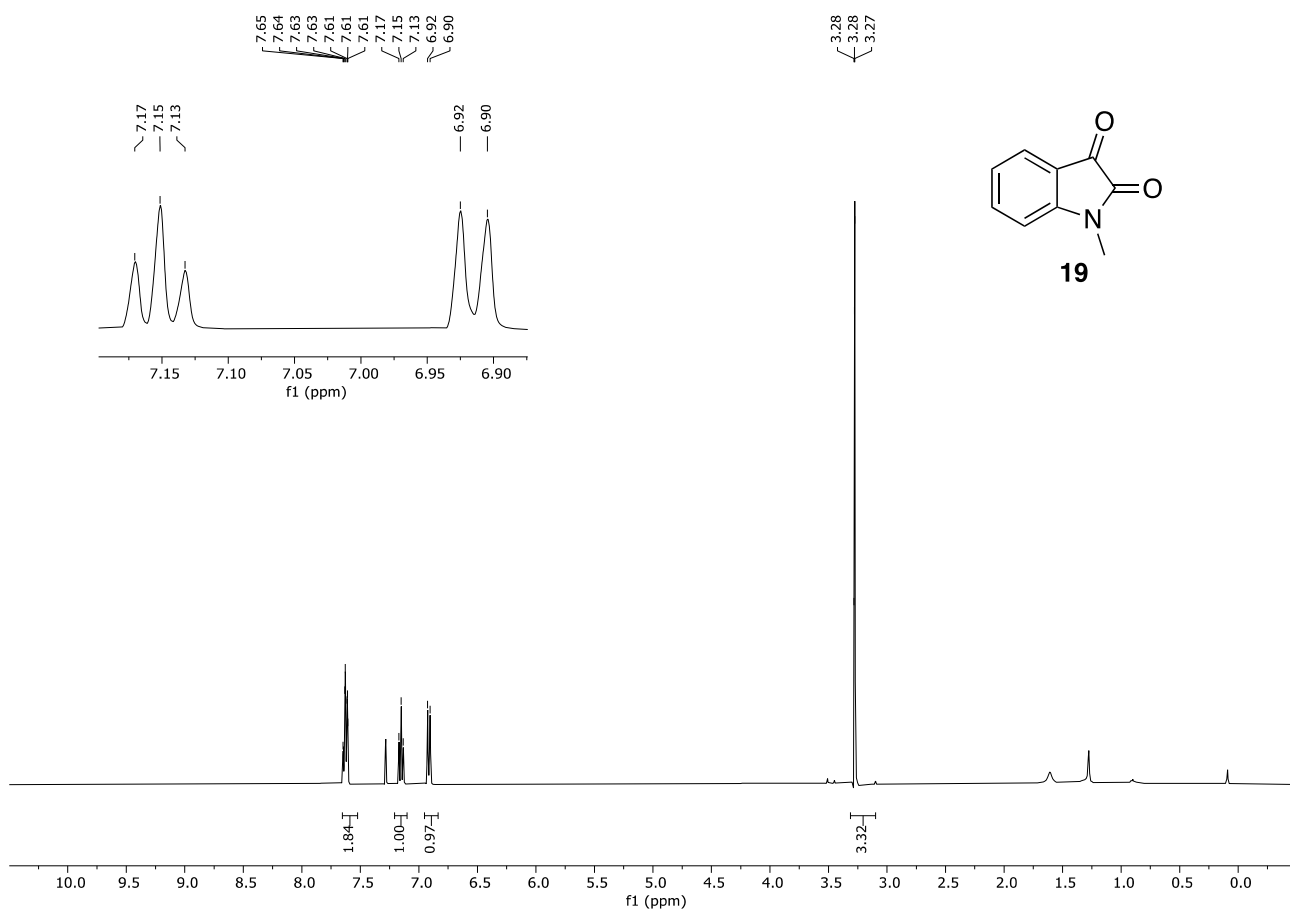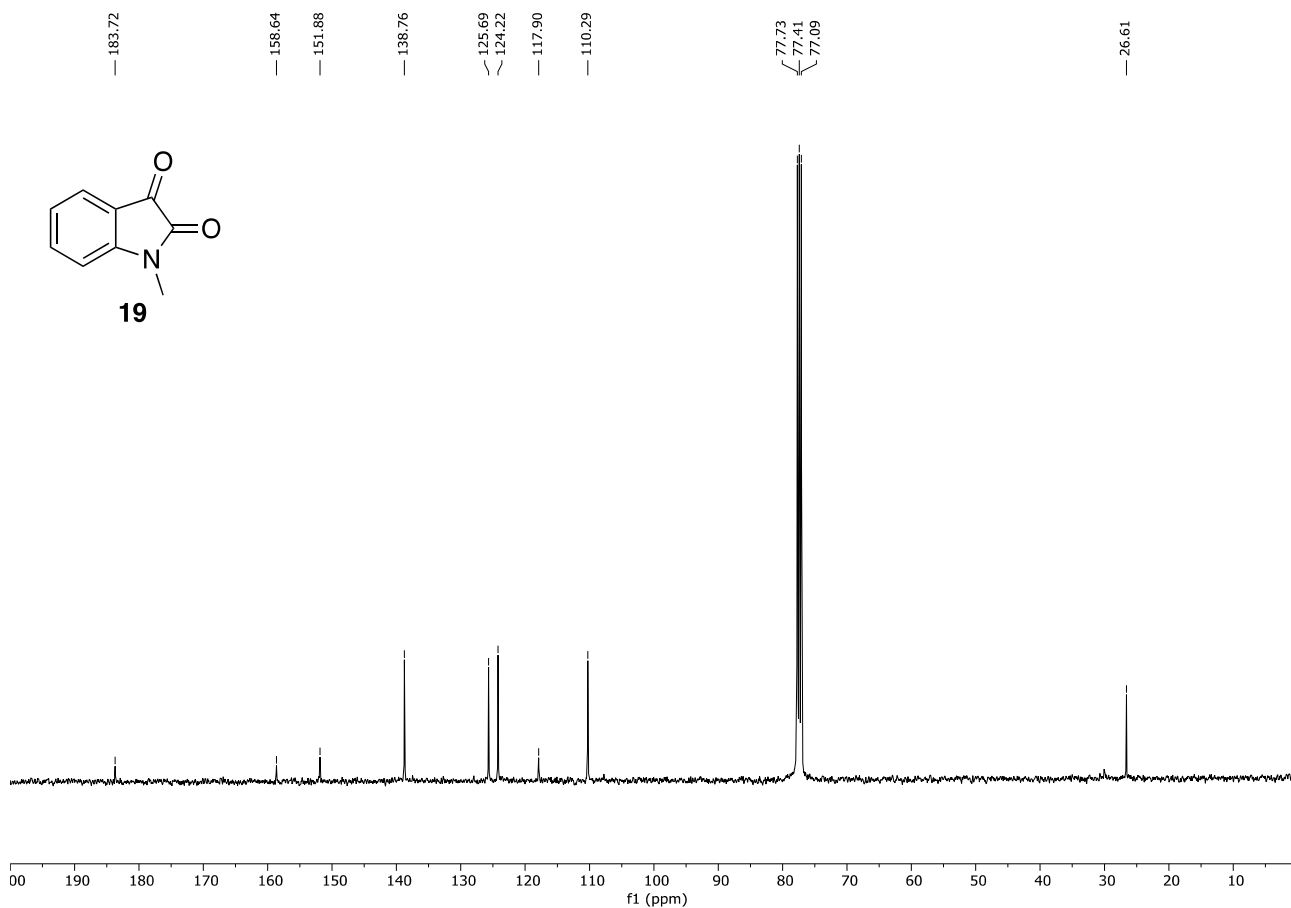

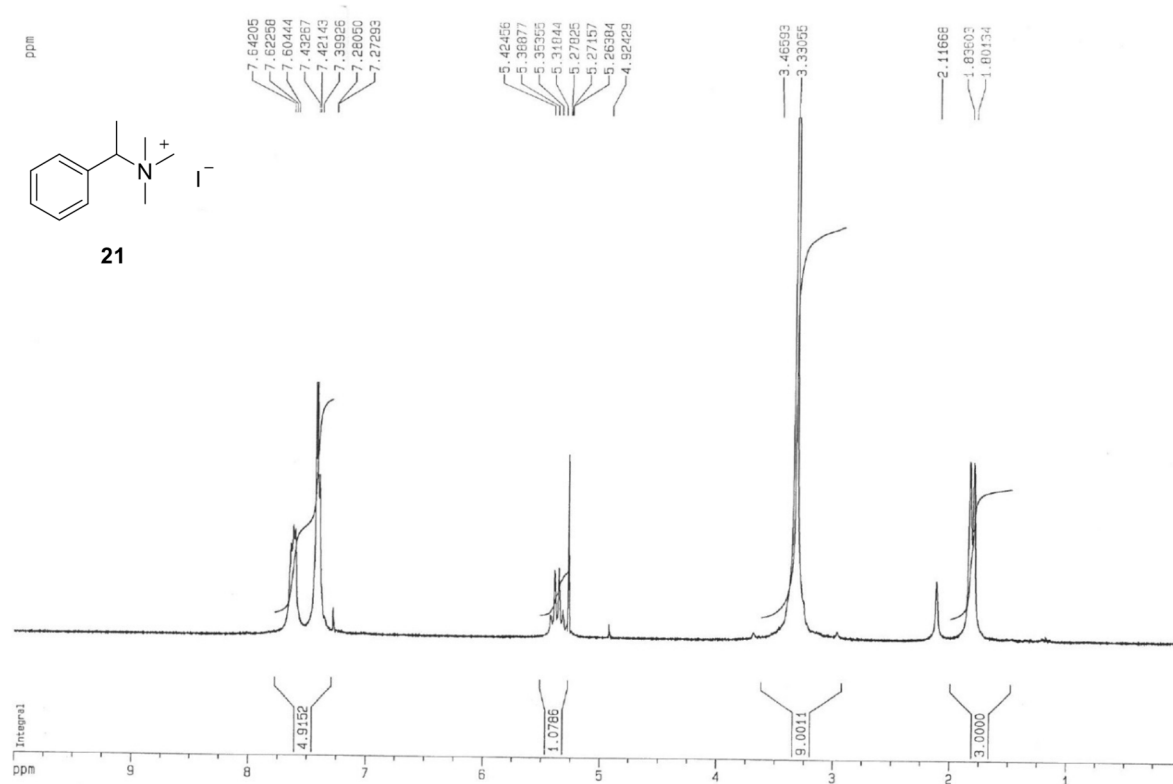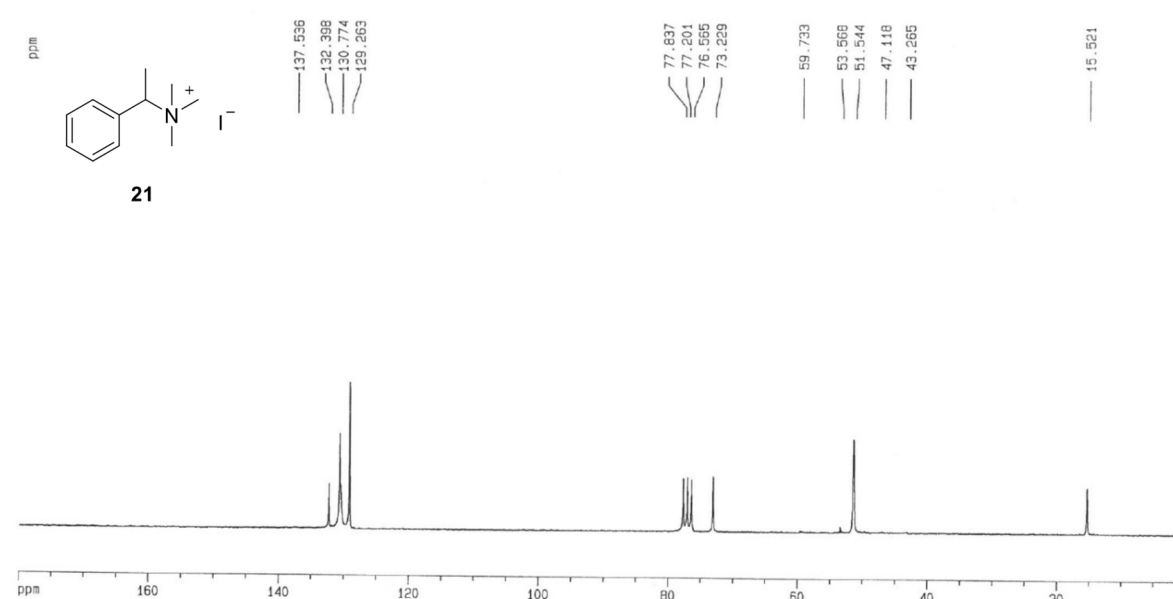

Supplement: s1 [file s1]
